# Supplementary material for: Malnutrition and its association with readmission and death within 7 days and 8–180 days postdischarge in older patients: a prospective observational study
Source: PubMed Central journal article supplement — BMJ Open. 2017 Nov 12;7(11):e018443. doi: 10.1136/bmjopen-2017-018443 (PMC5695574; doi:10.1136/bmjopen-2017-018443), 2017-11-12
Supplement: bmjopen-2017-018443.draft_revisions.pdf [file bmjopen-2017-018443.draft_revisions.pdf]

# BMJ Open

BMJ Open is committed to open peer review. As part of this commitment we make the peer review history of every article we publish publicly available.

When an article is published we post the peer reviewers' comments and the authors' responses online. We also post the versions of the paper that were used during peer review. These are the versions that the peer review comments apply to.

The versions of the paper that follow are the versions that were submitted during the peer review process. They are not the versions of record or the final published versions. They should not be cited or distributed as the published version of this manuscript.

BMJ Open is an open access journal and the full, final, typeset and author-corrected version of record of the manuscript is available on our site with no access controls, subscription charges or pay-per-view fees (<http://bmjopen.bmj.com>).

If you have any questions on BMJ Open's open peer review process please email [editorial.bmjopen@bmj.com](mailto:editorial.bmjopen@bmj.com)

# BMJ Open

## Malnutrition and its association with readmission and death within 7 days and 180 days post-discharge in older patients-a prospective study

|                                 |                                                                                                                                                                                                                                                                                                                                                                                                                                                                                                                                                                                                                  |
|---------------------------------|------------------------------------------------------------------------------------------------------------------------------------------------------------------------------------------------------------------------------------------------------------------------------------------------------------------------------------------------------------------------------------------------------------------------------------------------------------------------------------------------------------------------------------------------------------------------------------------------------------------|
| Journal:                        | <i>BMJ Open</i>                                                                                                                                                                                                                                                                                                                                                                                                                                                                                                                                                                                                  |
| Manuscript ID                   | bmjopen-2017-018443                                                                                                                                                                                                                                                                                                                                                                                                                                                                                                                                                                                              |
| Article Type:                   | Research                                                                                                                                                                                                                                                                                                                                                                                                                                                                                                                                                                                                         |
| Date Submitted by the Author:   | 30-Jun-2017                                                                                                                                                                                                                                                                                                                                                                                                                                                                                                                                                                                                      |
| Complete List of Authors:       | Sharma, Yogesh; Flinders Medical Centre, General Medicine; Flinders University Faculty of Medicine Nursing and Health Sciences<br>Miller, Michelle; Flinders University Faculty of Medicine Nursing and Health Sciences, Nutrition & Dietetics<br>Kaambwa, Billingsley; Flinders University Faculty of Medicine Nursing and Health Sciences, Health Economics<br>Shahi, Rashmi; Flinders University Faculty of Medicine Nursing and Health Sciences<br>Hakendorf, Paul; Flinders Medical Centre<br>Horwood, Chris; Flinders Medical Centre<br>Thompson, Campbell; University of Adelaide, Discipline of Medicine |
| <b>Primary Subject Heading</b>: | Nutrition and metabolism                                                                                                                                                                                                                                                                                                                                                                                                                                                                                                                                                                                         |
| Secondary Subject Heading:      | Geriatric medicine                                                                                                                                                                                                                                                                                                                                                                                                                                                                                                                                                                                               |
| Keywords:                       | GERIATRIC MEDICINE, NUTRITION & DIETETICS, Quality in health care < HEALTH SERVICES ADMINISTRATION & MANAGEMENT, GENERAL MEDICINE (see Internal Medicine)                                                                                                                                                                                                                                                                                                                                                                                                                                                        |
|                                 |                                                                                                                                                                                                                                                                                                                                                                                                                                                                                                                                                                                                                  |

SCHOLARONE™  
Manuscripts

1  
2  
3 **Malnutrition and its association with readmission and death within 7 days and**  
4  
5 **180 days post-discharge in older patients-a prospective study**  
6

7 Yogesh Sharma<sup>1</sup>, Michelle Miller<sup>2</sup>, Billingsley Kaambwa<sup>3</sup>, Rashmi Shahi<sup>4</sup>, Paul Hakendorf<sup>5</sup>, Chris Horwood<sup>6</sup>,  
8 Campbell Thompson<sup>7</sup>  
9

10 **Author Affiliations**  
11

12 Dr Yogesh Sharma  
13 Consultant Physician  
14 Department of General Medicine  
15 Flinders Medical Centre, South Australia  
16 School of Medicine  
17 Flinders University, South Australia  
18 Tel. +61 8 82046694  
19 Fax: +61 8 82046255  
20 Email: [Yogesh.Sharma@sa.gov.au](mailto:Yogesh.Sharma@sa.gov.au)  
21  
22

23 Prof Michelle Miller  
24 Department of Nutrition & Dietetics  
25 Flinders University, South Australia  
26 Tel: 08 72218855  
27 Fax: 08 82046408  
28 Email: [michelle.miller@flinders.edu.au](mailto:michelle.miller@flinders.edu.au)  
29  
30

31 Dr Billingsley Kaambwa  
32 Department of Health Economics  
33 Flinders University, South Australia  
34 Tel: +61 8 8275 2859  
35 Fax: +61 8 8275 2854  
36 [Billy.kambwa@flinders.edu.au](mailto:Billy.kambwa@flinders.edu.au)  
37  
38

39 Dr Rashmi Shahi  
40 Faculty of Health Sciences  
41 Flinders University, South Australia  
42 Tel. +61423156984  
43 Fax: 08 82046408  
44 Email: [shah0103@flinders.edu.au](mailto:shah0103@flinders.edu.au)  
45  
46

47 Paul Hakendorf  
48 Clinical Epidemiologist  
49 Department of Clinical Epidemiology  
50 Flinders Medical Centre, South Australia  
51 Tel: +61 8 8204 3950  
52 Email: [paul.hakendorf@sa.gov.au](mailto:paul.hakendorf@sa.gov.au)  
53  
54  
55  
56  
57  
58  
59  
60

1  
2  
3 Chris Horwood  
4 Clinical Epidemiologist  
5 Department of Clinical Epidemiology  
6 Flinders Medical Centre, South Australia  
7 Tel: +61 8 82043179  
8 Email: [chris.horwood@sa.gov.au](mailto:chris.horwood@sa.gov.au)  
9

10  
11  
12 Prof Campbell Thompson  
13 Discipline of Medicine  
14 University of Adelaide, South Australia  
15 Tel: +61 8 8222 4176  
16 Fax: +61 8 8222 4179  
17 Email: [campbell.thompson@adelaide.edu.au](mailto:campbell.thompson@adelaide.edu.au)  
18  
19

20  
21  
22 **Corresponding Author**  
23

24 Dr Yogesh Sharma  
25 Consultant Physician  
26 Department of General Medicine  
27 Flinders Medical Centre, South Australia  
28 School of Medicine  
29 Flinders University, South Australia  
30 Tel. +61 8 82046694  
31 Fax: +61 8 82046255  
32 Email: [Yogesh.Sharma@sa.gov.au](mailto:Yogesh.Sharma@sa.gov.au)  
33  
34

35 Word count: 2800  
36  
37  
38  
39  
40  
41  
42  
43  
44  
45  
46  
47  
48  
49  
50  
51  
52  
53  
54  
55  
56  
57  
58  
59  
60

## Abstract

**Objective** The relationship between admission nutritional status and clinical outcomes following hospital discharge is not well established. This study investigated whether nutrition status at admission predicts unplanned readmission or death in the very early or late period following hospital discharge in older patients.

**Design, Setting and Participants** We prospectively recruited 297 patients  $\geq 60$  years presenting to the General Medicine Department of a tertiary care hospital in Australia. Nutrition status was assessed at admission by using the Patient Generated Subjective Global Assessment (PG-SGA) tool and patients were classified as either nourished (PG-SGA class A) or malnourished (PG-SGA class B and C). Multivariate logistic regression model was used to adjust for other covariates known to influence clinical outcomes, to determine whether malnutrition is a predictor for early (0-7 days) or late (8-180 days) readmission or death following discharge.

**Outcome measures** The impact of nutritional status was measured on a combined endpoint of any readmission or death within 0-7 days and between 8-180 days following discharge from hospital.

**Results** Within 7 days following discharge, 29 (10.5%) had an unplanned readmission or death whereas an additional 124 (50.0%) patients reached this combined endpoint within 8-180 days post-discharge. Malnutrition was associated with a significantly higher risk of combined endpoint of readmissions or death both within 7 days (OR 4.57, 95% CI 1.69-12.27,  $p < 0.001$ ) as well within 8-180 days (OR 1.98, 95% CI 1.19-

1  
2  
3 3.28, p=0.007) following discharge and this risk remained significant even after  
4  
5 adjustment for other covariates.  
6  
7

8  
9  
10 **Conclusions** Malnutrition at the time of hospital admission is a significant predictor  
11  
12 of readmission or death both in very early and late period following hospital discharge  
13  
14 in older patients and nutritional state should be included in future risk prediction  
15  
16 models.  
17

### 18 19 **Strengths and limitations of this study**

- 20  
21  
22  
23  
24 • Large prospective observational study evaluating the association between  
25  
26 nutritional status and readmission or death in medical inpatients  $\geq 60$  years  
27  
28  
29 • Use of a comprehensive and valid nutritional assessment tool by a dietitian to  
30  
31 confirm diagnosis of malnutrition  
32  
33  
34 • Readmissions presenting to all other hospitals were captured  
35  
36  
37 • Single-centre study included only older medical patients  
38  
39  
40  
41  
42  
43  
44  
45  
46  
47  
48  
49  
50  
51  
52  
53  
54  
55  
56  
57  
58  
59  
60

## Introduction

Recent decades have witnessed a vast improvement in life expectancy with consequent increasing numbers of older patients with multiple chronic problems. While the number of beds for acute patients has declined unplanned hospital admissions have increased, especially among the elderly.<sup>1</sup> Older patients with multiple comorbid illnesses experience poor clinical outcomes after discharge from hospital including recurrent unplanned readmissions and mortality.<sup>2</sup> Adverse outcomes following discharge may be indicative of unresolved acute illness,<sup>3</sup> ongoing chronic illness,<sup>4</sup> the development of new medical problems or gaps in outpatient care.<sup>5</sup> Although adverse outcomes following discharge are not totally preventable, studies does suggest that targeted intervention such as improved discharge planning with a focus on transitional care services may provide beneficial results.<sup>6</sup> The likelihood of an unplanned admission is highest in the immediate post discharge period,<sup>7</sup> so there may be advantages in predicting re-admissions that occur shortly after discharge. However, the majority of studies have only assessed readmission patterns within 30 days of discharge and very few studies have studied readmission patterns up to 180 days post-discharge. Grahams et al<sup>8</sup> have suggested that different risk factors may be responsible for very early and late readmissions and each type of readmission needs differently targeted interventions which can only be implemented in advance if predictive factors are identified.

Readmission and mortality risk prediction remains poorly understood and is a complex endeavour. A recent meta-analysis<sup>9</sup> of 26 readmission risk prediction models of medical patients tested in a variety of populations and settings and used for comparisons of different hospitals and appropriate application of transitional care

1  
2  
3 services found poor predictive ability of these models and suggested a need for high  
4  
5 quality data sources that include clinical relevant variables. None of the studies  
6  
7 included in this meta-analysis has taken into account the nutritional status of patients  
8  
9 during index admission as a determinant of readmissions.

10  
11 Studies suggest that up to 30% of hospitalized patients may be malnourished at the  
12  
13 time of admission<sup>10</sup> and malnutrition has a negative impact on convalescence, reduces  
14  
15 resistance to future infections and diseases with consequent poor clinical outcomes.<sup>11</sup>

16  
17  
18 <sup>12</sup> However few studies have assessed the association between nutrition status at  
19  
20 admission and clinical outcomes in the very early and late period following discharge  
21  
22 from hospital. Moreover, the majority of these studies are retrospective and the use of  
23  
24 a comprehensive nutritional assessment tool like Patient Generated Subjective Global  
25  
26 Assessment (PG-SGA) to diagnose malnutrition is rare. This study was therefore  
27  
28 designed to determine whether nutrition status at admission as diagnosed by PG-SGA  
29  
30 by a qualified dietitian influences a combined clinical outcome of readmission or  
31  
32 mortality within 7 days and between 8-180 days following discharge from hospital  
33  
34 and whether malnutrition could be used as one of the predictors of early and late  
35  
36 readmissions and death.  
37  
38  
39  
40  
41  
42

## 43 **Methods**

### 44 45 46 47 **Study design and population**

48  
49  
50  
51  
52 In this prospective cohort study, we included patients  $\geq 60$  years of age admitted to the  
53  
54 Department of General Medicine of a large tertiary care hospital in Australia (Flinders  
55  
56 Medical Centre, 520 beds), between August 2014 and March 2016. The exclusion  
57  
58  
59  
60



1  
2  
3 criteria were refusal or inability to give informed consent, patients referred to  
4 palliative care and non-English speaking patients. Non-English speaking patients  
5 were excluded due to lack of funds to seek services of an interpreter. Ethical approval  
6 was obtained from Southern Adelaide Human Research Committee (SAC HREC)  
7 approval number (273.14-HREC/14/SAC/282) on 21<sup>st</sup> July 2014. For this  
8 observational cohort study we did not perform sample size calculation and limited our  
9 sample size to the resources available.  
10  
11  
12  
13  
14  
15  
16  
17  
18  
19

## 20 **Outcomes**

21  
22  
23  
24  
25 We defined our primary outcome as a combined endpoint of either the first unplanned  
26 readmission to any of the acute care hospitals in the state of South Australia or death,  
27 within 0-7 days and between 8-180 days after discharge from index hospitalization. In  
28 this study unplanned readmission was defined as any unscheduled hospitalization to  
29 any hospital in the state of South Australia which was not for a planned investigation  
30 (eg, elective endoscopy) or non-emergent treatment (eg, planned drug infusion). The  
31 primary endpoint of readmissions or deaths were recorded from a central computer  
32 database, which captures these events for all state hospitals.  
33  
34  
35  
36  
37  
38  
39  
40  
41  
42  
43  
44

## 45 **Nutritional status assessment**

46  
47  
48  
49 After obtaining written informed consent from patients, nutrition screening was  
50 performed by a member of the research team using the Malnutrition Universal  
51 Screening Tool (MUST) and all patients were then referred to a qualified dietitian for  
52  
53  
54  
55  
56  
57  
58  
59  
60

1  
2  
3 confirmation of nutrition status by PG-SGA. The PG-SGA<sup>13</sup> generates a numerical  
4 score while also providing an overall global rating divided into three categories: well  
5 nourished (PG-SGA A), moderately malnourished or suspected of being  
6 malnourished (PG-SGA B) or severely malnourished (PG-SGA C). For each  
7 component of the PG-SGA, points (0-4) are awarded depending on the impact on  
8 nutritional status. Component scores are summed up to obtain total scores that range  
9 from 0-35 with scores  $\geq 7$  indicating a critical need for nutritional intervention and  
10 symptom management in older subjects.<sup>14</sup> Three different dietitians who were  
11 involved in the assessment of nutritional status using the PG-SGA received training  
12 prior to commencement of this study. We dichotomized PG-SGA classes into two  
13 categories by combining PG-SGA class B and C into malnourished category for ease  
14 of interpretation of patients as nourished (PG-SGA class A) and malnourished (PG-  
15 SGA class B and C). Further, PG-SGA scores were dichotomized into a categorical  
16 variable with a PG-SGA score of  $< 7$  indicative of no critical need for nutrition  
17 intervention and  $\geq 7$  indicating critical need for intervention.  
18  
19  
20  
21  
22  
23  
24  
25  
26  
27  
28  
29  
30  
31  
32  
33  
34  
35  
36  
37

### 38 **Covariates**

39  
40 A number of known variables which can influence outcomes after discharge from  
41 hospital were recorded at the baseline. Sociodemographic data, number of  
42 hospitalisations during the 6 months before index admission and clinical information  
43 were recorded at the baseline. Comorbidity was assessed by the Charlson comorbidity  
44 index and the total number of medications were recorded at the time of admission.  
45  
46 Health-related quality of life (HRoL) was assessed using EuroQoL 5 dimensions 5  
47 level (EQ-5D 5L)<sup>15</sup> questionnaire, a simple, self-administered instrument which is  
48 able to distinguish between 3,125 states of health. A UK-specific algorithm developed  
49  
50  
51  
52  
53  
54  
55  
56  
57  
58  
59  
60

1  
2  
3 using time-trade-off techniques was used to convert the EQ-5D 5L health description  
4 into a valuation ranging from -0.281 to 1.<sup>16</sup> A visual analogue scale (VAS) score,  
5 which provides an unweighted measure of HRoL, can also be calculated from the  
6 questionnaire. The main diagnosis of index admission was retrieved from medical  
7 records and divided into 7 categories according to the system affected: (1) respiratory  
8 disease, (2) cardiovascular disease (3) neuropsychiatric disease, (4) gastrointestinal  
9 disease, (5) Falls, (6) renal disease, and (7) miscellaneous diseases including  
10 infections. The acuity of the index admission was gauged from the total number of  
11 medical emergency response team calls and number of hours spent in the intensive  
12 care unit. Length of hospital stay (LOS) was determined from the day of admission to  
13 the day of discharge. We recorded any unplanned hospital presentations to any of the  
14 hospitals in South Australia within 0-7days and between 8-180days after discharge  
15 from hospital in addition to any recorded deaths at the same time points using central  
16 hospital computer database.  
17  
18  
19  
20  
21  
22  
23  
24  
25  
26  
27  
28  
29  
30  
31  
32  
33  
34  
35

### 36 **Statistics**

37  
38  
39  
40  
41 Demographic variables were assessed for normality using Skewness and kurtosis (sk)  
42 test. Data are presented as mean (SD) or median (IQR) and student t test and rank sum  
43 tests were applied as appropriate. Categorical variables are expressed as frequency  
44 and percent and compared using Pearson's  $\chi^2$  or Fisher's exact test as appropriate.  
45  
46  
47  
48

49  
50 Univariate logistic regression was used to assess the association between nutritional  
51 status and a combined end point of unplanned readmission or death within 7 days and  
52 between 8-180 days post-discharge. In a multivariate logistic regression analysis the  
53 relationship between readmission/death and nutrition status at admission was adjusted  
54  
55  
56  
57  
58  
59  
60

1  
2  
3 for other variables-age, gender, Charlson index, principal diagnosis at presentation,  
4  
5 number of medications at admission, length of hospital stay, number of medical  
6  
7 emergency response team calls during index admission and total number of hours  
8  
9 spent in intensive care unit (ICU). Variance inflation factor and tolerance values<sup>17</sup>  
10  
11 were used to detect collinearity between variables included in the model. A link test  
12  
13 was used to confirm that the linear approach to model the outcome was correct.  
14  
15 Model fit was assessed using the Hosmer-Lemeshow goodness-of-fit test. Kaplan  
16  
17 Meier survival curve was plotted from time of discharge to the first onset of any of  
18  
19 the primary outcomes to detect proportion of patients who did not experience the  
20  
21 primary outcome. Log rank test was used to compare survival proportions in the  
22  
23 nourished and malnourished groups. A two-sided  $p < 0.05$  was considered to indicate  
24  
25 statistical significance. All analysis were performed using STATA version 13.1  
26  
27 (StataCorp, College Station, Texas, USA).  
28  
29  
30  
31  
32  
33

## 34 **Results**

35  
36 We recruited 297 patients in this study and nutrition status, as determined by PG-  
37  
38 SGA, was available for 277 patients. Mean age was 80.3 years (SD 8.7, range 60-97)  
39  
40 and 178 (64.3%) were females. Patients had multiple comorbidities (mean number of  
41  
42 comorbidities 6.2, SD 2.7, range 0-16) and mean Charlson comorbidity index was 2.3  
43  
44 (SD 1.8). Median length of stay for index hospitalization was 7.0 (IQR 3.4-14.6) days.  
45  
46 Within 7 days after discharge, 29 (10.5%) patients had an unplanned readmission or  
47  
48 death (primary endpoint). Among the 29 patients who had primary endpoint within 7  
49  
50 days, 13 (44.8%) had been previously readmitted prior to the index admission.  
51  
52 Primary endpoint occurred in 124 (50.0%) patients within 8-180 days post-discharge  
53  
54 and 69 (55.7%) of these patients had been admitted in the six months prior to the  
55  
56  
57  
58  
59  
60

index admission. Patients who were malnourished at the time of index admission were significantly older ( $p=0.001$ ), had lower quality of life ( $p=0.03$ ) and stayed longer ( $p=0.02$ ) in hospital as compared to nourished patients. Respiratory illness, miscellaneous diseases including sepsis and cardiovascular diseases were the three frequent main diagnosis of index hospitalization with 86 (28.9%), 67 (22.6%) and 55 (18.5%) cases, respectively.

**Table 1 Baseline characteristics according to primary endpoint (readmission/death) at 0-7 days and 8-180 days post-discharge**

|                                              | Readmission/death within 0-7 days (n= 29) | No readmission/death within 0-7 days (n=248) |         | Readmission/death within 8-180 days (n=124) | No readmission/death within 8-180 days (n=124) |         |
|----------------------------------------------|-------------------------------------------|----------------------------------------------|---------|---------------------------------------------|------------------------------------------------|---------|
|                                              |                                           |                                              | p value |                                             |                                                | p value |
| Age mean (SD)                                | 81.2 (7.6)                                | 80.2 (8.8)                                   | 0.74    | 80.3 (8.6)                                  | 80.0 (9.0)                                     | 0.77    |
| Female sex n (%)                             | 13 (44.8)                                 | 165 (66.5)                                   | 0.02    | 80 (64.5)                                   | 85 (68.5)                                      | 0.50    |
| Total comorbidities mean (SD)                | 6.8 (3.0)                                 | 6.1 (2.7)                                    | 0.20    | 6.6 (2.9)                                   | 5.7 (2.5)                                      | 0.012   |
| Charlson index mean (SD)                     | 2.8 (2.1)                                 | 2.2 (1.8)                                    | 0.09    | 2.4 (1.8)                                   | 2.1 (1.8)                                      | 0.16    |
| Total medications mean (SD)                  | 9.1 (4.5)                                 | 9.6 (4.4)                                    | 0.56    | 10.3 (4.5)                                  | 8.9 (4.2)                                      | 0.007   |
| Principal diagnosis at index admission n (%) |                                           |                                              |         |                                             |                                                |         |
| Respiratory                                  | 13 (44.8)                                 | 72 (29.0)                                    | 0.34    | 33 (26.6)                                   | 39 (31.5)                                      | 0.02    |
| CVS                                          | 6 (20.7)                                  | 44 (17.7)                                    |         | 28 (22.6)                                   | 16 (12.9)                                      |         |
| Neuropsychiatric                             | 2 (6.9)                                   | 23 (9.3)                                     |         | 11 (8.9)                                    | 12 (9.7)                                       |         |
| GIT                                          | 2 (6.9)                                   | 17 (6.9)                                     |         | 11 (8.9)                                    | 6 (4.8)                                        |         |
| Falls                                        | 0 (0)                                     | 21 (8.5)                                     |         | 4 (3.2)                                     | 17 (13.7)                                      |         |
| Renal                                        | 0 (0)                                     | 16 (6.5)                                     |         | 6 (4.8)                                     | 10 (8.1)                                       |         |
| Miscellaneous                                | 6 (20.7)                                  | 55 (22.2)                                    |         | 31 (25.0)                                   | 24 (19.4)                                      |         |
| LOS median (IQR)                             | 13.3 (6.7-35.9)                           | 6.8 (3.2-13.7)                               | 0.004   | 7.9 (3.6-15.2)                              | 5.7 (3.1-11.5)                                 | 0.11    |
| MUST score <sup>a</sup>                      | 1.9 (1.4)                                 | 1.1 (1.2)                                    | 0.001   | 1.3 (1.3)                                   | 0.9 (1.2)                                      | 0.03    |
| Nutrition status PG-SGA <sup>b</sup> n (%)   |                                           |                                              |         |                                             |                                                |         |
| Nourished                                    | 5 (17.2)                                  | 121 (48.8)                                   | 0.001   | 50 (40.3)                                   | 71 (57.3)                                      | 0.008   |
| Malnourished                                 | 24 (82.8)                                 | 127 (51.2)                                   |         | 74 (59.7)                                   | 53 (42.7)                                      |         |
| Patients with PG-SGA $\geq 7$ n (%)          | 25 (86.2)                                 | 142 (57.3)                                   | 0.002   | 80 (64.5)                                   | 62 (50.0)                                      | 0.02    |
| QoL mean (SD)                                |                                           |                                              |         |                                             |                                                |         |
| EQ-5D index <sup>c</sup>                     | 0.678 (0.226)                             | 0.709 (0.222)                                | 0.49    | 0.700 (0.229)                               | 0.717 (0.217)                                  | 0.31    |
| VAS <sup>d</sup>                             | 55.2 (17.1)                               | 59.5 (20.1)                                  | 0.28    | 55.9 (20.4)                                 | 62.8 (18.1)                                    |         |
| Total MET calls mean (SD)                    | 0.24 (1.0)                                | 0.13 (0.4)                                   | 0.38    | 0.10 (0.32)                                 | 0.15 (0.53)                                    | 0.95    |
| Total ICU hours mean (SD)                    | 4.3 (19.3)                                | 1.9 (13.4)                                   | 0.53    | 2.3 (15.5)                                  | 1.5 (11.0)                                     | 0.62    |

SD, standard deviation; CVS, cardiovascular; GIT, gastrointestinal; LOS, length of hospital stay; IQR, interquartile range; MUST, malnutrition universal screening tool; PG-SGA, patient generated subjective global assessment; QoL, quality of life; EQ-5D, european quality of life 5 dimension; VAS, visual analogue scale; MET, medical emergency team; ICU, intensive care unit  
<sup>a</sup>Higher MUST score indicates high risk for malnutrition, <sup>b</sup>PG-SGA class dichotomized to PG-SGA A (nourished) and PG-SGA B and C (malnourished), <sup>c</sup>Higher EQ-5D index indicates better QoL, <sup>d</sup>Higher VAS indicates better QoL

## Association of malnutrition very early and late unplanned readmissions and mortality

Table 1 shows the baseline characteristics according to the occurrence of combined endpoint of readmission or death within 0-7 days and 8-180 days of discharge, respectively. Malnutrition risk as determined by the MUST score and classification of patients as being malnourished by PG-SGA class were significantly higher in subjects who developed the combined endpoint both within 0-7 days (83% vs 51%) and 8-180 (60% vs 43%) days post-discharge ( $p < 0.05$ ). Similarly a significantly higher proportion of patients who were in critical need of nutrition therapy (as indicated by PG-SGA score of  $\geq 7$ ) at the time of index admission suffered the combined endpoint both within 0-7 days ( $p = 0.002$ ) as well as 8-180 days ( $p = 0.02$ ) following discharge from hospital (Table 1).

**Table 2 Multivariable regression model for early and late readmission/mortality**

| Variable                                             | Early readmission/death<br>(0-7 days)<br>Odds ratio (95% CI) <sup>a</sup> | Late readmission/death<br>(8-180 days)<br>Odds ratio (95% CI) |
|------------------------------------------------------|---------------------------------------------------------------------------|---------------------------------------------------------------|
| Malnourished                                         | 5.01 (1.69-14.75)*                                                        | 1.97 (1.12-3.47)*                                             |
| Age                                                  | 1.00 (0.94-1.05)                                                          | 1.00 (0.97-1.03)                                              |
| Female sex                                           | 0.42 (0.17-1.04)                                                          | 0.93(0.52-1.66)                                               |
| Total comorbidities                                  | 1.15 (0.96-1.38)                                                          | 1.08 (0.95-1.22)                                              |
| Charlson comorbidity index                           | 1.08 (0.84-1.39)                                                          | 1.03 (0.86-1.23)                                              |
| Medications during index admission                   | 0.91 (0.81-1.02)                                                          | 1.05 (0.98-1.12)                                              |
| LOS of index admission                               | 1.03 (1.00-1.05)*                                                         | 1.01 (0.99-1.02)                                              |
| Admissions in last 6 months prior to index admission | 0.66 (0.27-1.58)                                                          | 1.38 (0.79-2.40)                                              |
| Principal diagnosis index admission                  |                                                                           |                                                               |
| Reference (Resp. illness)                            | -                                                                         | -                                                             |
| CVS                                                  | 0.63 (0.20-2.04)                                                          | 2.06 (0.91-4.70)                                              |
| CNS                                                  | 0.34 (0.06-1.93)                                                          | 1.12 (0.41-3.04)                                              |
| GIT                                                  | 0.42 (0.07-2.36)                                                          | 1.91 (0.58-6.28)                                              |
| Falls                                                | -                                                                         | 0.26 (0.07-0.89)                                              |
| Urinary                                              | -                                                                         | 0.71 (0.21-2.32)                                              |
| Miscellaneous                                        | 0.35 (0.11-1.12)                                                          | 1.36 (0.63-2.92)                                              |
| ICU hours during index admission                     | 1.01 (0.97-1.05)                                                          | 1.01 (0.98-1.03)                                              |
| Total MET calls index admission                      | 0.84 (0.31-2.22)                                                          | 0.66 (0.32-1.34)                                              |

<sup>a</sup>odds ratio determined using multivariable logistic regression (using early/late readmissions as outcome variable)

\* p value  $< 0.05$

CI, confidence interval; LOS, length of hospital stay; CVS, cardiovascular; CNS, central nervous system; GIT, gastrointestinal; ICU, intensive care unit; MET, medical emergency team

1  
2  
3 Malnutrition was associated with a higher risk of combined endpoint of readmissions  
4 and death within 7 days after discharge (OR 4.57, 95% CI 1.69-12.27,  $p<0.001$ ). After  
5  
6 adjusting for covariates including age, gender, Charlson index, LOS, number of  
7  
8 medications, principal diagnosis at current admission and hours spent in intensive  
9  
10 care unit during index admission, the association was even stronger for the combined  
11  
12 end point (OR 5.01, 95% CI 1.69-14.75,  $p=0.009$ ) (Table 2). Similarly between 8-180  
13  
14 days post discharge, malnourished patients had higher odds to have a combined end  
15  
16 point of readmission and death (OR 1.98, 95% CI 1.19-3.28,  $p=0.007$ ) and this  
17  
18 remained significant even after adjustment for the above covariates (OR 1.97, 95% CI  
19  
20 1.12-3.47,  $p=0.002$ ) (Table 2). The p-value for the Hosmer-Lemeshow goodness-of-  
21  
22 fit was  $>0.05$  for both the adjusted models, indicating a good fit. The variance  
23  
24 inflation factors and tolerance were near 1.00 for all variables, excluding significant  
25  
26 collinearity. The link test confirmed that the linear approach to model the outcomes  
27  
28 was correct. The Kaplan meier survival curve (Figure 1) shows that the nourished  
29  
30 group had significant less readmissions and deaths at 180 days than the malnourished  
31  
32 group (log rank  $\chi^2=0.11$ ,  $p<0.001$ ).  
33  
34  
35  
36  
37  
38  
39  
40  
41  
42  
43  
44  
45  
46  
47  
48  
49  
50  
51  
52  
53  
54  
55  
56  
57  
58  
59  
60

Figure 1 Kaplan-Meier survival curve for combined outcome in nourished and malnourished

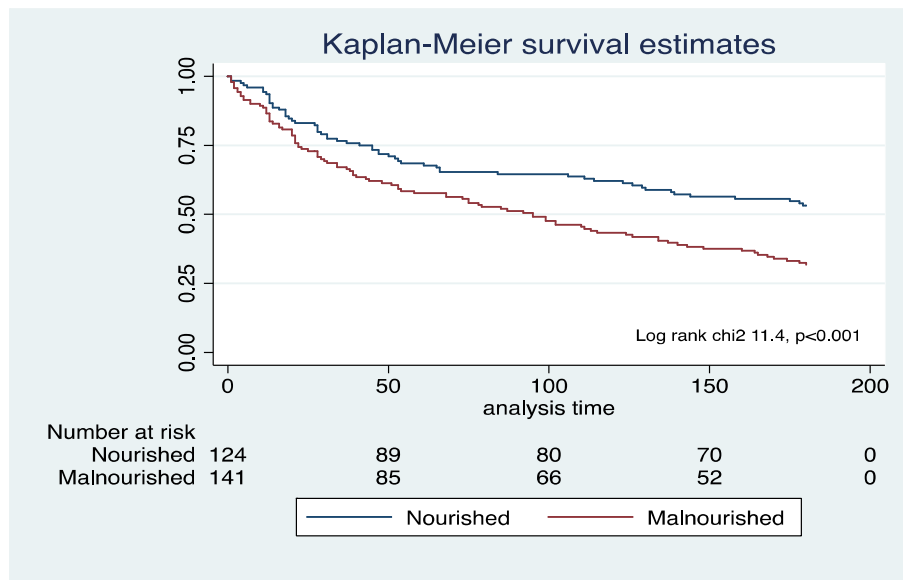

## Discussion

The results of the present study indicate that malnutrition at admission as determined by the PG-SGA, was a significant predicting factor of a combined end point of readmission or mortality in older general medical patients, both during early period as well as late after discharge from hospital. Malnutrition was associated with an almost four-fold increased risk of readmission or mortality within 7 days after discharge and the risk almost doubled between 8-180 days after discharge. Malnutrition remained a significant predictor even after adjustment for other covariates, which could have influenced clinical outcome.

One appealing explanation for these results is that the acute condition responsible for the index admission weakens the overall health of the patients and malnutrition further compounds this problem with a consequent higher risk of complications or exacerbations of previously stable comorbidities.<sup>18</sup> The post-discharge period is a fragile period, referred to as “post-hospital syndrome.”<sup>19</sup> This syndrome has been



1  
2  
3 described as a period of vulnerability due to impaired physiological systems, depleted  
4 reserves, and lower body resistance against health threats, on top of the recent acute  
5 illness responsible for the index admission. Our study results brings another  
6 dimension to this theory: that impaired nutritional status may play a significant role in  
7 the post-discharge period beyond 7 days. Malnutrition might well be exacerbated by  
8 the acute illness and the stress of the index admission, and may consequently induce a  
9 relapse or predispose to new acute illnesses<sup>20</sup> that increase the risk of readmission or  
10 mortality.  
11

12  
13  
14  
15  
16  
17  
18  
19  
20  
21 The results of the present study are in line with Mogensen et al<sup>21</sup> who found that  
22 malnourished patients who survived intensive care admission had higher 90-day  
23 mortality (OR 3.72, 95% CI 1.2-6.3) and malnutrition was a significant predictor of  
24 their 30-day unplanned hospital readmission. Studies in heart failure patients have  
25 suggested that malnutrition may mediate progression of the underlying heart disease  
26 due to low-grade inflammation leading to poor outcomes and was a significant  
27 predictor of readmissions.<sup>22</sup>  
28

29  
30  
31  
32  
33  
34  
35  
36  
37  
38  
39  
40  
41  
42  
43  
44  
45  
46  
47  
48  
49  
50  
51  
52  
53  
54  
55  
56  
57  
58  
59  
60  
Older general medical patients are known to have substantial long-term morbidity and  
mortality. Known risk factors for adverse events following discharge include multiple  
comorbidity,<sup>23</sup> severity of index admission and institutional care rather than  
domiciliary care.<sup>2</sup> Hospital readmissions represent a multifaceted problem that still  
needs better understanding.<sup>18</sup> Presumably there are other factors which influence  
patient outcomes after discharge which are not well known. What our study illustrates  
is that early and late post discharge outcomes in patients discharged from hospital  
appear to be associated with the presence of malnutrition early in the course of  
admission. While causation cannot be inferred from an observational study, the  
malnutrition-post discharge outcome has biological plausibility.

1  
2  
3 To date, no study has included nutritional status in the development of predictive tool  
4  
5 for readmissions and this area needs further research. Studies do suggest that  
6  
7 nutritional intervention initiated early during hospitalization by providing high energy  
8  
9 protein-energy supplements with continuation post hospital discharge does have a  
10  
11 favorable impact on nutritional parameters and reduces length of hospital stay<sup>24</sup> but its  
12  
13 impact on mortality and readmissions is unclear and such an intervention may be too  
14  
15 late for some.<sup>25</sup> While the ideal intervention to improve nutritional status in  
16  
17 hospitalized patients has yet to be identified,<sup>26</sup> the solution may lie in recognizing and  
18  
19 managing malnutrition in the community well before any admission to hospital.  
20  
21  
22  
23

### 24 25 **Limitations**

26  
27 This study has several limitations. Firstly, it is a single centre study in a tertiary care  
28  
29 hospital. The case mix of patients discharged from our hospital may differ from that  
30  
31 of other hospitals, so the results may not be generalizable to other hospitals, especially  
32  
33 to community hospitals, although it is likely to be similar to other academic hospitals  
34  
35 in Australia. We were unable to adjust our analysis for functional status or other  
36  
37 factors such as appropriateness of drugs, clinical stability at discharge or social factors  
38  
39 that might influence readmission. This study involved older general medical patients  
40  
41 who frequently suffer from multiple comorbidities and are our results may not be  
42  
43 applicable to relatively younger subspecialty patients with single organ system  
44  
45 involvement.  
46  
47  
48

49 One of the strengths of this study is that it was a prospective study and diagnosis of  
50  
51 malnutrition was confirmed by a comprehensive nutrition assessment tool by a  
52  
53 dietitian. We were able to assess all readmissions in all the hospitals of the state  
54  
55  
56  
57  
58  
59  
60

1  
2  
3 unlike some of the other studies, which were only able to capture readmissions to a  
4  
5 single hospital.  
6  
7

### 8 9 **Implications**

10  
11  
12  
13  
14 This study has several implications. Transitions of care should focus not only on the  
15  
16 acute condition but also on patients' nutrition status, because the latter may increase  
17  
18 risk of readmission or death. There is a need for future well-designed studies to look  
19  
20 into the beneficial effects of an intervention targeting malnutrition and whether this  
21  
22 prevents readmissions and mortality. In the interim, nutritional intervention should be  
23  
24 most effective if begun early during admission and should be continued in the  
25  
26 community following discharge by referral to either a community dietitian or follow-  
27  
28 up in outpatient dietetics clinics. Overall, public health policies to optimize nutrition  
29  
30 of all those over 60 years of age may result in a reduction in health care utilization.  
31  
32  
33  
34  
35

### 36 **Conclusion**

37  
38  
39  
40 Impaired nutritional status at admission predicts poor clinical outcomes in both early  
41  
42 and late post-discharge periods as determined by readmissions and mortality in older  
43  
44 general medical patients and a targeted nutritional intervention may prove beneficial  
45  
46 in malnourished patients.  
47  
48  
49  
50

51  
52 **Contributors:** YS, CT and MM designed the study and YS, CT, BK and MM carried  
53  
54 out the analysis and interpretation. YS and RS lead the study and was responsible for  
55  
56 data acquisition. YS, PH and CH provided statistical input. YS and RS undertook  
57  
58  
59  
60

1  
2  
3 recruitment. YS and CT wrote the manuscript, which was edited by BK and MM. All  
4  
5 authors approved final manuscript.  
6  
7  
8

9  
10 **Funding:** This study did was not supported by any funding.  
11

12  
13  
14 **Competing interests:** None  
15

16  
17  
18 **Data sharing statement:** The data that support the findings of this study are available  
19  
20 from the corresponding author upon reasonable request.  
21  
22

## 23 24 25 26 27 28 29 30 31 32 33 34 35 36 37 38 39 40 41 42 43 44 45 46 47 48 49 50 51 52 53 54 55 56 57 58 59 60

### References

1. Royal College of Physicians. Hospitals on the Edge? The Time for Action. London: Royal College of Physicians, 2012 [Internet]. 2012. <https://www.rcplondon.ac.uk/guidelines-policy/hospitals-edge-time-action>.
2. Balla U, Malnick S, Schattner A. Early readmissions to the department of medicine as a screening tool for monitoring quality of care problems. *Medicine* 2008;**87**(5):294-300.
3. Klausen HH, Petersen J, Bandholm T, et al. Association between routine laboratory tests and long-term mortality among acutely admitted older medical patients: a cohort study. *BMC geriatrics* 2017;**17**(1):62.
4. Puhan MA, Scharplatz M, Troosters T, et al. Respiratory rehabilitation after acute exacerbation of COPD may reduce risk for readmission and mortality -- a systematic review. *Respiratory research* 2005;**6**:54.
5. Dharmarajan K, Hsieh AF, Lin Z, et al. Diagnoses and timing of 30-day readmissions after hospitalization for heart failure, acute myocardial infarction, or pneumonia. *Jama* 2013;**309**(4):355-63.
6. Bradley EH, Curry L, Horwitz LI, et al. Hospital strategies associated with 30-day readmission rates for patients with heart failure. *Circulation Cardiovascular quality and outcomes* 2013;**6**(4):444-50.
7. Jencks SF, Williams MV, Coleman EA. Rehospitalizations among patients in the Medicare fee-for-service program. *The New England journal of medicine* 2009;**360**(14):1418-28.
8. Graham KL, Marcantonio ER. Differences Between Early and Late Readmissions Among Patients. *Ann Intern Med* 2015;**163**(8):650.
9. Kansagara D, Englander H, Salanitro A, et al. Risk prediction models for hospital readmission: a systematic review. *Jama* 2011;**306**(15):1688-98.

10. Charlton K, Nichols C, Bowden S, et al. Poor nutritional status of older subacute patients predicts clinical outcomes and mortality at 18 months of follow-up. *Eur J Clin Nutr* 2012;**66**(11):1224-8.
11. Stratton RJ, Hebuterne X, Elia M. A systematic review and meta-analysis of the impact of oral nutritional supplements on hospital readmissions. *Ageing research reviews* 2013;**12**(4):884-97.
12. Sharma Y, Thompson C, Shahi R, et al. Malnutrition in acutely unwell hospitalized elderly - "The skeletons are still rattling in the hospital closet". *Journal of Nutrition, Health and Aging* 2017:1-6.
13. Desbrow B, Bauer J, Blum C, et al. Assessment of nutritional status in hemodialysis patients using patient-generated subjective global assessment. *Journal of renal nutrition : the official journal of the Council on Renal Nutrition of the National Kidney Foundation* 2005;**15**(2):211-6.
14. Marshall S, Young A, Bauer J, et al. Malnutrition in Geriatric Rehabilitation: Prevalence, Patient Outcomes, and Criterion Validity of the Scored Patient-Generated Subjective Global Assessment and the Mini Nutritional Assessment. *Journal of the Academy of Nutrition and Dietetics* 2016;**116**(5):785-94.
15. Bushnell DMM, Mona, L.; Ricci, Jean-Francois.; Bracco, Andrea;. Performance of the EQ-5D in Patients with Irritable Bowel Syndrome. *Value in Health* 2006;**9**(2):90-97.
16. Cole A, Shah K, Mulhern B, et al. Valuing EQ-5D-5L health states 'in context' using a discrete choice experiment. *The European journal of health economics : HEPAC : health economics in prevention and care* 2017.
17. Belsley DA, Kuh E, Welsch RE. *Regression diagnostics: Identifying influential data and sources of collinearity*: John Wiley & Sons, 2005.
18. Donze J, Lipsitz S, Bates DW, et al. Causes and patterns of readmissions in patients with common comorbidities: retrospective cohort study. *Bmj* 2013;**347**:f7171.
19. Krumholz HM. Post-hospital syndrome--an acquired, transient condition of generalized risk. *The New England journal of medicine* 2013;**368**(2):100-2.
20. Mazzola P, Ward L, Zazzetta S, et al. Association Between Preoperative Malnutrition and Postoperative Delirium After Hip Fracture Surgery in Older Adults. *Journal of the American Geriatrics Society* 2017;**65**(6):1222-28.
21. Mogensen KM, Horkan CM, Purtle SW, et al. Malnutrition, Critical Illness Survivors, and Postdischarge Outcomes: A Cohort Study. *JPEN Journal of parenteral and enteral nutrition* 2017:148607117709766.
22. Agra Bermejo RM, Gonzalez Ferreiro R, Varela Roman A, et al. Nutritional status is related to heart failure severity and hospital readmissions in acute heart failure. *International journal of cardiology* 2017;**230**:108-14.
23. Graham KL, Wilker EH, Howell MD, et al. Differences between early and late readmissions among patients: a cohort study. *Ann Intern Med* 2015;**162**(11):741-9.
24. Sharma Y, Thompson C, Kaambwa B, et al. Investigation of the benefits of early malnutrition screening with telehealth follow up in elderly acute medical admissions. *Qjm* 2017.

- 1  
2  
3 25. Bally MR, Blaser Yildirim PZ, Bounoure L, et al. Nutritional Support and  
4 Outcomes in Malnourished Medical Inpatients: A Systematic Review and  
5 Meta-analysis. *JAMA internal medicine* 2016;**176**(1):43-53.  
6  
7 26. Milne AC, Potter J, Vivanti A, et al. Protein and energy supplementation in  
8 elderly people at risk from malnutrition. *Cochrane Database Syst Rev*  
9 2009;**2**(2).  
10  
11  
12  
13  
14  
15  
16  
17  
18  
19  
20  
21  
22  
23  
24  
25  
26  
27  
28  
29  
30  
31  
32  
33  
34  
35  
36  
37  
38  
39  
40  
41  
42  
43  
44  
45  
46  
47  
48  
49  
50  
51  
52  
53  
54  
55  
56  
57  
58  
59  
60

STROBE Statement—Checklist of items that should be included in reports of *cross-sectional studies*

|                              | Item No | Recommendation                                                                                                                                                                                                                                                                                                                                                                                                               |
|------------------------------|---------|------------------------------------------------------------------------------------------------------------------------------------------------------------------------------------------------------------------------------------------------------------------------------------------------------------------------------------------------------------------------------------------------------------------------------|
| <b>Title and abstract</b>    | 1       | (a) Indicate the study's design with a commonly used term in the title or the abstract ( <b>Within the title page 1 and methods section of abstract page 3</b> )<br>(b) Provide in the abstract an informative and balanced summary of what was done and what was found ( <b>see results section of abstract page 3 and 4</b> )                                                                                              |
| <b>Introduction</b>          |         |                                                                                                                                                                                                                                                                                                                                                                                                                              |
| Background/rationale         | 2       | Explain the scientific background and rationale for the investigation being reported ( <b>pages 5-6</b> )                                                                                                                                                                                                                                                                                                                    |
| Objectives                   | 3       | State specific objectives, including any prespecified hypotheses ( <b>page 6</b> )                                                                                                                                                                                                                                                                                                                                           |
| <b>Methods</b>               |         |                                                                                                                                                                                                                                                                                                                                                                                                                              |
| Study design                 | 4       | Present key elements of study design early in the paper ( <b>Methods section pages 6-7</b> )                                                                                                                                                                                                                                                                                                                                 |
| Setting                      | 5       | Describe the setting, locations, and relevant dates, including periods of recruitment, exposure, follow-up, and data collection ( <b>pages 6-7</b> )                                                                                                                                                                                                                                                                         |
| Participants                 | 6       | (a) Give the eligibility criteria, and the sources and methods of selection of participants ( <b>pages 6-7</b> )                                                                                                                                                                                                                                                                                                             |
| Variables                    | 7       | Clearly define all outcomes, exposures, predictors, potential confounders, and effect modifiers. Give diagnostic criteria, if applicable ( <b>pages 7-8</b> )                                                                                                                                                                                                                                                                |
| Data sources/<br>measurement | 8*      | For each variable of interest, give sources of data and details of methods of assessment (measurement). Describe comparability of assessment methods if there is more than one group ( <b>pages 8-9</b> )                                                                                                                                                                                                                    |
| Bias                         | 9       | Describe any efforts to address potential sources of bias ( <b>N/A</b> )                                                                                                                                                                                                                                                                                                                                                     |
| Study size                   | 10      | Explain how the study size was arrived at ( <b>page 7</b> )                                                                                                                                                                                                                                                                                                                                                                  |
| Quantitative variables       | 11      | Explain how quantitative variables were handled in the analyses. If applicable, describe which groupings were chosen and why ( <b>pages 8-9</b> )                                                                                                                                                                                                                                                                            |
| Statistical methods          | 12      | (a) Describe all statistical methods, including those used to control for confounding ( <b>pages 9-10</b> )<br>(b) Describe any methods used to examine subgroups and interactions ( <b>N/A</b> )<br>(c) Explain how missing data were addressed ( <b>N/A</b> )<br>(d) If applicable, describe analytical methods taking account of sampling strategy ( <b>N/A</b> )<br>(e) Describe any sensitivity analyses ( <b>N/A</b> ) |
| <b>Results</b>               |         |                                                                                                                                                                                                                                                                                                                                                                                                                              |
| Participants                 | 13*     | (a) Report numbers of individuals at each stage of study—eg numbers potentially eligible, examined for eligibility, confirmed eligible, included in the study, completing follow-up, and analysed                                                                                                                                                                                                                            |

|                          |     |                                                                                                                                                                                                                                             |
|--------------------------|-----|---------------------------------------------------------------------------------------------------------------------------------------------------------------------------------------------------------------------------------------------|
|                          |     | <b>(page 10 and Table 1)</b>                                                                                                                                                                                                                |
|                          |     | (b) Give reasons for non-participation at each stage (N/A)                                                                                                                                                                                  |
|                          |     | (c) Consider use of a flow diagram (N/A information in Table 1)                                                                                                                                                                             |
| Descriptive data         | 14* | (a) Give characteristics of study participants (eg demographic, clinical, social) and information on exposures and potential confounders ( <b>pages 10-11 and Table 1</b> )                                                                 |
|                          |     | (b) Indicate number of participants with missing data for each variable of interest (N/A)                                                                                                                                                   |
| Outcome data             | 15* | Report numbers of outcome events or summary measures ( <b>pages 10-11</b> )                                                                                                                                                                 |
| Main results             | 16  | (a) Give unadjusted estimates and, if applicable, confounder-adjusted estimates and their precision (eg, 95% confidence interval). Make clear which confounders were adjusted for and why they were included ( <b>page 12 and Table 2</b> ) |
|                          |     | (b) Report category boundaries when continuous variables were categorized ( <b>page 12</b> )                                                                                                                                                |
|                          |     | (c) If relevant, consider translating estimates of relative risk into absolute risk for a meaningful time period (N/A)                                                                                                                      |
| Other analyses           | 17  | Report other analyses done—eg analyses of subgroups and interactions, and sensitivity analyses (N/A)                                                                                                                                        |
| <b>Discussion</b>        |     |                                                                                                                                                                                                                                             |
| Key results              | 18  | Summarise key results with reference to study objectives ( <b>page 14</b> )                                                                                                                                                                 |
| Limitations              | 19  | Discuss limitations of the study, taking into account sources of potential bias or imprecision. Discuss both direction and magnitude of any potential bias ( <b>page 16</b> )                                                               |
| Interpretation           | 20  | Give a cautious overall interpretation of results considering objectives, limitations, multiplicity of analyses, results from similar studies, and other relevant evidence ( <b>pages 15-16</b> )                                           |
| Generalisability         | 21  | Discuss the generalisability (external validity) of the study results ( <b>pages 16-17</b> )                                                                                                                                                |
| <b>Other information</b> |     |                                                                                                                                                                                                                                             |
| Funding                  | 22  | Give the source of funding and the role of the funders for the present study and, if applicable, for the original study on which the present article is based ( <b>page 18</b> )                                                            |

\*Give information separately for exposed and unexposed groups.

**Note:** An Explanation and Elaboration article discusses each checklist item and gives methodological background and published examples of transparent reporting. The STROBE checklist is best used in conjunction with this article (freely available on the Web sites of PLoS Medicine at <http://www.plosmedicine.org/>, Annals of Internal Medicine at <http://www.annals.org/>, and Epidemiology at <http://www.epidem.com/>). Information on the STROBE Initiative is available at [www.strobe-statement.org](http://www.strobe-statement.org).



# BMJ Open

## Malnutrition and its association with readmission and death within 7 days and within 8 to 180 days post-discharge in older patients: a prospective observational study

|                                 |                                                                                                                                                                                                                                                                                                                                                                                                                                                                                                                                                                                                                  |
|---------------------------------|------------------------------------------------------------------------------------------------------------------------------------------------------------------------------------------------------------------------------------------------------------------------------------------------------------------------------------------------------------------------------------------------------------------------------------------------------------------------------------------------------------------------------------------------------------------------------------------------------------------|
| Journal:                        | <i>BMJ Open</i>                                                                                                                                                                                                                                                                                                                                                                                                                                                                                                                                                                                                  |
| Manuscript ID                   | bmjopen-2017-018443.R1                                                                                                                                                                                                                                                                                                                                                                                                                                                                                                                                                                                           |
| Article Type:                   | Research                                                                                                                                                                                                                                                                                                                                                                                                                                                                                                                                                                                                         |
| Date Submitted by the Author:   | 20-Sep-2017                                                                                                                                                                                                                                                                                                                                                                                                                                                                                                                                                                                                      |
| Complete List of Authors:       | Sharma, Yogesh; Flinders Medical Centre, General Medicine; Flinders University Faculty of Medicine Nursing and Health Sciences<br>Miller, Michelle; Flinders University Faculty of Medicine Nursing and Health Sciences, Nutrition & Dietetics<br>Kaambwa, Billingsley; Flinders University Faculty of Medicine Nursing and Health Sciences, Health Economics<br>Shahi, Rashmi; Flinders University Faculty of Medicine Nursing and Health Sciences<br>Hakendorf, Paul; Flinders Medical Centre<br>Horwood, Chris; Flinders Medical Centre<br>Thompson, Campbell; University of Adelaide, Discipline of Medicine |
| <b>Primary Subject Heading</b>: | Nutrition and metabolism                                                                                                                                                                                                                                                                                                                                                                                                                                                                                                                                                                                         |
| Secondary Subject Heading:      | Geriatric medicine                                                                                                                                                                                                                                                                                                                                                                                                                                                                                                                                                                                               |
| Keywords:                       | GERIATRIC MEDICINE, NUTRITION & DIETETICS, Quality in health care < HEALTH SERVICES ADMINISTRATION & MANAGEMENT, GENERAL MEDICINE (see Internal Medicine)                                                                                                                                                                                                                                                                                                                                                                                                                                                        |
|                                 |                                                                                                                                                                                                                                                                                                                                                                                                                                                                                                                                                                                                                  |

SCHOLARONE™  
Manuscripts

1  
2  
3 **Malnutrition and its association with readmission and death within 7 days and**  
4  
5 **within 8 to 180 days post-discharge in older patients: a prospective observational**  
6  
7 **study**  
8

9 Yogesh Sharma<sup>1</sup>, Michelle Miller<sup>2</sup>, Billingsley Kaambwa<sup>3</sup>, Rashmi Shahi<sup>4</sup>, Paul Hakendorf<sup>5</sup>, Chris Horwood<sup>6</sup>,  
10 Campbell Thompson<sup>7</sup>  
11

12 **Author Affiliations**  
13

14 Dr Yogesh Sharma  
15 Consultant Physician  
16 Department of General Medicine  
17 Flinders Medical Centre, South Australia  
18 School of Medicine  
19 Flinders University, South Australia  
20 Tel. +61 8 82046694  
21 Fax: +61 8 82046255  
22 Email: [Yogesh.Sharma@sa.gov.au](mailto:Yogesh.Sharma@sa.gov.au)  
23  
24

25  
26 Prof Michelle Miller  
27 Department of Nutrition & Dietetics  
28 Flinders University, South Australia  
29 Tel: 08 72218855  
30 Fax: 08 82046408  
31 Email: [michelle.miller@flinders.edu.au](mailto:michelle.miller@flinders.edu.au)  
32

33  
34 Dr Billingsley Kaambwa  
35 Department of Health Economics  
36 Flinders University, South Australia  
37 Tel: +61 8 8275 2859  
38 Fax: +61 8 8275 2854  
39 [Billy.kambwa@flinders.edu.au](mailto:Billy.kambwa@flinders.edu.au)  
40

41 Dr Rashmi Shahi  
42 Faculty of Health Sciences  
43 Flinders University, South Australia  
44 Tel. +61423156984  
45 Fax: 08 82046408  
46 Email: [shah0103@flinders.edu.au](mailto:shah0103@flinders.edu.au)  
47  
48

49 Paul Hakendorf  
50 Clinical Epidemiologist  
51 Department of Clinical Epidemiology  
52 Flinders Medical Centre, South Australia  
53 Tel: +61 8 8204 3950  
54 Email: [paul.hakendorf@sa.gov.au](mailto:paul.hakendorf@sa.gov.au)  
55  
56  
57  
58  
59  
60

1  
2  
3  
4  
5 Chris Horwood  
6 Clinical Epidemiologist  
7 Department of Clinical Epidemiology  
8 Flinders Medical Centre, South Australia  
9 Tel: +61 8 82043179  
10 Email: [chris.horwood@sa.gov.au](mailto:chris.horwood@sa.gov.au)  
11

12  
13  
14 Prof Campbell Thompson  
15 Discipline of Medicine  
16 University of Adelaide, South Australia  
17 Tel: +61 8 70740231  
18 Email: [campbell.thompson@adelaide.edu.au](mailto:campbell.thompson@adelaide.edu.au)  
19

20  
21  
22  
23 **Corresponding Author**  
24

25 Dr Yogesh Sharma  
26 Consultant Physician  
27 Department of General Medicine  
28 Flinders Medical Centre, South Australia  
29 School of Medicine  
30 Flinders University, South Australia  
31 Tel. +61 8 82046694  
32 Fax: +61 8 82046255  
33 Email: [Yogesh.Sharma@sa.gov.au](mailto:Yogesh.Sharma@sa.gov.au)  
34  
35

36 Word count: 2800  
37  
38  
39  
40  
41  
42  
43  
44  
45  
46  
47  
48  
49  
50  
51  
52  
53  
54  
55  
56  
57  
58  
59  
60

## ABSTRACT

### Objective

The relationship between admission nutritional status and clinical outcomes following hospital discharge is not well established. This study investigated whether older patients' nutritional status at admission predicts unplanned readmission or death in the very early or late periods following hospital discharge.

### Design, Setting and Participants

The study prospectively recruited 297 patients  $\geq 60$  years old who were presenting to the General Medicine Department of a tertiary care hospital in Australia. Nutritional status was assessed at admission by using the Patient Generated Subjective Global Assessment (PG-SGA) tool and patients were classified as either nourished (PG-SGA class A) or malnourished (PG-SGA classes B and C). A multivariate logistic regression model was used to adjust for other covariates known to influence clinical outcomes and to determine whether malnutrition is a predictor for early (0-7 days) or late (8-180 days) readmission or death following discharge.

### Outcome measures

The impact of nutritional status was measured on a combined endpoint of any readmission or death within 0-7 days and between 8-180 days following hospital discharge.

### Results

1  
2  
3 Within seven days following discharge, 29 (10.5%) patients had an unplanned  
4 readmission or death whereas an additional 124 (50.0%) patients reached this  
5 combined endpoint within 8-180 days post-discharge. Malnutrition was associated  
6 with a significantly higher risk of combined endpoint of readmissions or death both  
7 within seven days (OR 4.57, 95% CI 1.69-12.37,  $p < 0.001$ ) and within 8-180 days  
8 (OR 1.98, 95% CI 1.19-3.28,  $p = 0.007$ ) following discharge and this risk remained  
9 significant even after adjustment for other covariates.  
10  
11  
12  
13  
14  
15  
16  
17  
18  
19

## 20 **Conclusions**

21 Malnutrition in older patients at the time of hospital admission is a significant  
22 predictor of readmission or death both in the very early and in the late periods  
23 following hospital discharge. Nutritional state should be included in future risk-  
24 prediction models.  
25  
26  
27  
28  
29  
30  
31  
32

## 33 **Strengths and limitations of this study**

- 34 • The research was a large prospective observational study evaluating the  
35 association between nutritional status and readmission or death in medical  
36 inpatients  $\geq 60$  years old.
- 37 • A dietitian used a comprehensive and valid nutritional assessment tool to  
38 confirm the malnutrition diagnosis.
- 39 • Readmissions presenting to all other hospitals were captured.
- 40 • The single-centre study included only older medical patients.
- 41  
42  
43  
44  
45  
46  
47  
48  
49  
50  
51  
52  
53  
54  
55  
56  
57  
58  
59  
60

## INTRODUCTION

Recent decades have witnessed a vast improvement in life expectancy, leading to an increasing number of older patients with multiple chronic problems. While the number of beds for acute patients has declined, unplanned hospital admissions have increased, particularly among the elderly.<sup>1</sup> Older patients with multiple comorbid illnesses experience poor clinical outcomes after hospital discharge, including recurrent unplanned readmissions and mortality.<sup>2</sup> Adverse outcomes following discharge may be indicative of unresolved acute illness, ongoing chronic illness and the development of new medical problems or gaps in outpatient care.<sup>3-5</sup> Although adverse outcomes following discharge are not totally preventable, studies suggest that targeted intervention such as improved discharge planning with a focus on transitional care services may provide beneficial results.<sup>6</sup>

The likelihood of an unplanned admission is highest in the immediate post-discharge period.<sup>7</sup> There may be advantages in predicting re-admissions that occur shortly after discharge. However, most studies have only assessed readmission patterns within 30 days of discharge, and few studies have examined readmission patterns up to 180 days post-discharge.<sup>8</sup> Graham et al. have suggested that different risk factors may be responsible for very early and late readmissions and that each type of readmission needs differently targeted interventions that can only be implemented in advance if predictive factors are identified.<sup>9</sup>

Readmission and mortality risk prediction is a complex endeavour and remains poorly understood. A recent meta-analysis of 26 readmission risk-prediction models for medical patients tested in a variety of populations and settings was used for comparing different hospitals and the appropriate applications of transitional care

1  
2  
3 services; the analysis found these models had a poor predictive ability and suggested a  
4  
5 need for high-quality data sources that include clinically relevant variables.<sup>10</sup> None of  
6  
7 the studies included in this meta-analysis considered patients' nutritional status during  
8  
9 index admission as a determinant of readmissions.

10  
11 Studies suggest that up to 30% of hospitalised patients may be malnourished at the  
12  
13 time of admission and that malnutrition has a negative impact on convalescence and  
14  
15 reduces resistance to future infections and diseases causing poor clinical outcomes.<sup>11-</sup>

16  
17  
18 <sup>13</sup> Older patients are at a high risk of malnutrition than others and reasons for poor  
19  
20 nutritional status in this group are multifactorial and include physiological, social and  
21  
22 psychological factors which affect food intake and weight and this is further  
23  
24 exacerbated by underlying medical illness.<sup>14</sup> Few studies have assessed the  
25  
26 association between nutritional status at admission and clinical outcomes in the very  
27  
28 early and the late periods following hospital discharge. Furthermore, most of these  
29  
30 studies are retrospective, and the use of a comprehensive nutritional assessment tool,  
31  
32 like the Patient Generated Subjective Global Assessment (PG-SGA), to diagnose  
33  
34 malnutrition is rare. Therefore, this study was designed to determine whether  
35  
36 nutritional status at admission, as diagnosed by a qualified dietitian using PG-SGA,  
37  
38 influences a combined clinical outcome of readmission or mortality within seven days  
39  
40 and between 8-180 days following hospital discharge and whether malnutrition could  
41  
42 be used as one of the predictors of early and late readmissions and death.  
43  
44  
45  
46  
47  
48

## 49 50 **METHODS**

### 51 52 53 54 **Study design and population**

55  
56  
57  
58  
59  
60

1  
2  
3 This prospective cohort study, included patients  $\geq 60$  years of age admitted to the  
4 Department of General Medicine of a large tertiary care hospital in Australia (Flinders  
5 Medical Centre, 520 beds), between August 2014 and March 2016. The exclusion  
6 criteria were refusal or inability to give informed consent, patients referred to  
7 palliative care and non-English-speaking patients, who were excluded due to a lack of  
8 funds to hire an interpreter. Ethical approval was obtained from Southern Adelaide  
9 Human Research Committee (SAC HREC; approval number 273.14-  
10 HREC/14/SAC/282) on 21 July 2014. The required sample size for this study,  
11 calculated on the basis of a previous study showing early readmission rate of 7.8%,  
12 was estimated at five hundred and sixty nine patients but insufficient resources led to  
13 the recruitment of only two hundred and ninety seven patients.<sup>9</sup>  
14  
15  
16  
17  
18  
19  
20  
21  
22  
23  
24  
25  
26  
27  
28  
29

### 30 **Outcomes**

31 The study's primary outcome was a combined endpoint of either the first unplanned  
32 readmission to any of the acute-care hospitals in the state of South Australia or death,  
33 within 0-7 days and between 8-180 days after hospital discharge. In this study,  
34 unplanned readmission was defined as any unscheduled hospitalisation to any hospital  
35 in the state of South Australia that was not for a planned investigation (e.g., elective  
36 endoscopy) or non-emergent treatment (e.g., planned drug infusion). The primary  
37 endpoint of readmissions or deaths were recorded from a central computer database,  
38 which captures these events for all state hospitals.  
39  
40  
41  
42  
43  
44  
45  
46  
47  
48  
49  
50  
51

### 52 **Nutritional status assessment**

53  
54  
55  
56  
57  
58  
59  
60



1  
2  
3 After obtaining written informed consent from patients, it was ensured that nutrition  
4 screening with Malnutrition Universal Screening Tool (MUST) had been performed.  
5  
6  
7 It is a standard policy in our hospital to screen all patients with MUST at the time of  
8 admission. MUST includes a body mass index (BMI) score, a weight loss score, and  
9 an acute disease score and classifies patients as low, moderate or high risk of  
10 malnutrition.<sup>15</sup> Following this all participating patients were then referred to a  
11 qualified dietitian for confirmation of their nutritional status by PG-SGA. The PG-  
12 SGA<sup>16</sup> generates a numerical score while also providing an overall global rating  
13 divided into three categories: well nourished (PG-SGA A), moderately malnourished  
14 or suspected of being malnourished (PG-SGA B) or severely malnourished (PG-SGA  
15 C). For each PG-SGA component, points (0-4) are awarded depending on the impact  
16 on nutritional status. Component scores are combined to obtain total scores that range  
17 from 0-35 with scores  $\geq 7$  indicating a critical need for nutritional intervention and  
18 symptom management.<sup>17</sup> The three different dietitians who were involved in the  
19 assessment of nutritional status using the PG-SGA received training prior to the  
20 study's commencement. The PG-SGA classes were divided into two categories by  
21 combining PG-SGA classes B and C into the malnourished category for easily  
22 interpreting patients as nourished (PG-SGA class A) and malnourished (PG-SGA  
23 classes B and C). Furthermore, PG-SGA scores were split into a categorical variable  
24 with a PG-SGA score of  $< 7$ , indicative of no critical need for nutrition intervention  
25 and  $\geq 7$ , indicating critical need for intervention.  
26  
27  
28  
29  
30  
31  
32  
33  
34  
35  
36  
37  
38  
39  
40  
41  
42  
43  
44  
45  
46  
47  
48  
49  
50

## 51 **Covariates**

52 Several known variables that can influence outcomes after hospital discharge were  
53 recorded at the baseline. Sociodemographic data, number of hospitalisations during  
54  
55  
56  
57  
58  
59  
60

1  
2  
3 the six months before index admission (current hospital admission) and clinical  
4  
5 information were recorded at the baseline. Comorbidity was assessed with the  
6  
7 Charlson comorbidity index, and the total number of medications were recorded at the  
8  
9 time of admission. Health-related quality of life (HRQoL) was assessed using the  
10  
11 EuroQoL 5 dimensions 5 level (EQ-5D 5L) questionnaire, a simple, self-administered  
12  
13 instrument which is able to distinguish between 3,125 states of health.<sup>18</sup> A UK-  
14  
15 specific algorithm developed using time-trade-off techniques was used to convert the  
16  
17 EQ-5D 5L health description into a valuation ranging from -0.281 to 1.<sup>19</sup> A visual  
18  
19 analogue scale (VAS) score, which provides an unweighted measure of HRQoL, can  
20  
21 also be calculated from the questionnaire. The main diagnosis of index admission was  
22  
23 retrieved from medical records and divided into seven categories according to the  
24  
25 system affected: (1) respiratory disease, (2) cardiovascular disease, (3)  
26  
27 neuropsychiatric disease, gastrointestinal disease, (5) falls, (6) renal disease, and  
28  
29 miscellaneous diseases, including infections. The index admission's acuity was  
30  
31 gauged from the total number of medical emergency response team calls and the  
32  
33 number of hours spent in the intensive care unit (ICU). Length of hospital stay (LOS)  
34  
35 was determined from the day of admission to the day of discharge. The study  
36  
37 recorded any unplanned hospital presentations to any of the hospitals in South  
38  
39 Australia within 0-7 days and between 8-180 days after hospital discharge, as well as  
40  
41 any recorded deaths at the same time points, using the central hospital computer  
42  
43 database.  
44  
45  
46  
47  
48  
49  
50  
51

## 52 **Statistics**

53  
54  
55  
56  
57  
58  
59  
60

1  
2  
3 Demographic variables were assessed for normality using a skewness and kurtosis  
4 (sk) test. Data are presented as mean (SD) or median (IQR), and student t-test and  
5 rank-sum tests were applied as appropriate. Categorical variables are expressed as  
6 frequency and percent and compared using Pearson's  $\chi^2$  or Fisher's exact test as  
7 appropriate.  
8  
9

10  
11  
12  
13  
14 Univariate logistic regression was used to assess the association between nutritional  
15 status and the combined end point of unplanned readmission or death within seven  
16 days and between 8-180 days post-discharge. In a multivariate logistic regression  
17 analysis, the relationship between readmission/death and nutrition status at admission  
18 was adjusted for other variables: age, gender, Charlson index, principal diagnosis at  
19 presentation, number of medications at admission, length of hospital stay, number of  
20 medical emergency response team calls during index admission and total number of  
21 hours spent in the ICU. Variance inflation factor and tolerance values were used to  
22 detect collinearity between variables included in the model.<sup>20</sup> A link test was used to  
23 confirm that the linear approach to model the outcome was correct. Model fit was  
24 assessed using the Hosmer-Lemeshow goodness-of-fit test. A Kaplan Meier survival  
25 curve was plotted from time of discharge to the first onset of any of the primary  
26 outcomes to detect proportion of patients who did not experience the primary  
27 outcome. A Log rank test was used to compare survival proportions in the nourished  
28 and malnourished groups. A two-sided  $p < 0.05$  was considered to indicate statistical  
29 significance. All analysis was performed using STATA version 13.1 (StataCorp,  
30 College Station, Texas, USA).  
31  
32  
33  
34  
35  
36  
37  
38  
39  
40  
41  
42  
43  
44  
45  
46  
47  
48  
49  
50

## 51 52 53 54 RESULTS

1  
2  
3 This study recruited 297 patients, and nutrition status, as determined by PG-SGA, was  
4 available for 277 patients. Mean age was 80.3 years (SD 8.7, range 60-97) with 178  
5 (64.3%) of the patients being females and the majority of patients came from home.  
6  
7  
8  
9  
10 There was no difference in the nutrition status between males and females (mean PG-  
11 SGA score 9.7 (SD 5.8) vs. 9.2 (SD 5.3),  $p = 0.44$ ) in males and females respectively)  
12  
13 and the nutrition status of patients who came from a nursing home was similar to  
14 those who came from home (mean PG-SGA score 9.0 (SD 4.5) vs. 9.4 (SD 5.6),  $p =$   
15 0.70) in nursing home and patients from home, respectively). Patients had multiple  
16 comorbidities (mean number of comorbidities 6.2, SD 2.7, range 0-16), and the mean  
17 Charlson comorbidity index was 2.3 (SD 1.8). The median length of stay for the index  
18 hospitalisation was 7 (IQR 3.4-14.6) days. Within seven days after discharge, 29  
19 (10.5%) patients had an unplanned readmission or death (primary endpoint). Among  
20 the 29 patients who had the primary endpoint within seven days, 13 (44.8%) had been  
21 admitted prior to the index admission. The primary endpoint occurred in 124 (50.0%)  
22 patients within 8-180 days post-discharge and 69 (55.7%) of these patients had been  
23 admitted in the six months prior to the index admission. Patients who were  
24 malnourished at the time of index admission were significantly older ( $p = 0.001$ ), had  
25 lower quality of life ( $p = 0.03$ ) and stayed longer ( $p = 0.02$ ) in the hospital as  
26 compared to the nourished patients. Respiratory illness, miscellaneous diseases  
27 including sepsis and cardiovascular diseases were the three main diagnoses during  
28 index hospitalisation with 86 (28.9%), 67 (22.6%) and 55 (18.5%) cases, respectively.  
29  
30  
31  
32  
33  
34  
35  
36  
37  
38  
39  
40  
41  
42  
43  
44  
45  
46  
47  
48  
49  
50  
51

**Table 1 Baseline characteristics according to primary endpoint (readmission/death) at 0-7 days and 8-180 days post-discharge**

|                     | Readmission/death within 0-7 days (n= 29) | No readmission/death within 0-7 days (n=248) |         | Readmission/death within 8-180 days (n=124) | No readmission/death within 8-180 days (n=124) |         |
|---------------------|-------------------------------------------|----------------------------------------------|---------|---------------------------------------------|------------------------------------------------|---------|
|                     |                                           |                                              | P value |                                             |                                                | P value |
| Age mean (SD)       | 81.2 (7.6)                                | 80.2 (8.8)                                   | 0.74    | 80.3 (8.6)                                  | 80.0 (9.0)                                     | 0.77    |
| Female sex n (%)    | 13 (44.8)                                 | 165 (66.5)                                   | 0.02    | 80 (64.5)                                   | 85 (68.5)                                      | 0.50    |
| Total comorbidities | 6.8 (3.0)                                 | 6.1 (2.7)                                    | 0.20    | 6.6 (2.9)                                   | 5.7 (2.5)                                      | 0.012   |

|                                              |                 |                |       |                |                |       |
|----------------------------------------------|-----------------|----------------|-------|----------------|----------------|-------|
| mean (SD)                                    |                 |                |       |                |                |       |
| Charlson index mean (SD)                     | 2.8 (2.1)       | 2.2 (1.8)      | 0.09  | 2.4 (1.8)      | 2.1 (1.8)      | 0.16  |
| Total medications mean (SD)                  | 9.1 (4.5)       | 9.6 (4.4)      | 0.56  | 10.3 (4.5)     | 8.9 (4.2)      | 0.007 |
| Principal diagnosis at index admission n (%) |                 |                |       |                |                |       |
| Respiratory                                  | 13 (44.8)       | 72 (29.0)      | 0.34  | 33 (26.6)      | 39 (31.5)      | 0.02  |
| CVS                                          | 6 (20.7)        | 44 (17.7)      |       | 28 (22.6)      | 16 (12.9)      |       |
| Neuropsychiatric                             | 2 (6.9)         | 23 (9.3)       |       | 11 (8.9)       | 12 (9.7)       |       |
| GIT                                          | 2 (6.9)         | 17 (6.9)       |       | 11 (8.9)       | 6 (4.8)        |       |
| Falls                                        | 0 (0)           | 21 (8.5)       |       | 4 (3.2)        | 17 (13.7)      |       |
| Renal                                        | 0 (0)           | 16 (6.5)       |       | 6 (4.8)        | 10 (8.1)       |       |
| Miscellaneous                                | 6 (20.7)        | 55 (22.2)      |       | 31 (25.0)      | 24 (19.4)      |       |
| LOS median (IQR)                             | 13.3 (6.7-35.9) | 6.8 (3.2-13.7) | 0.004 | 7.9 (3.6-15.2) | 5.7 (3.1-11.5) | 0.11  |
| MUST score <sup>a</sup>                      | 1.9 (1.4)       | 1.1 (1.2)      | 0.001 | 1.3 (1.3)      | 0.9 (1.2)      | 0.03  |
| Nutrition status PG-SGA <sup>b</sup> n (%)   |                 |                |       |                |                |       |
| Nourished                                    | 5 (17.2)        | 121 (48.8)     | 0.001 | 50 (40.3)      | 71 (57.3)      | 0.008 |
| Malnourished                                 | 24 (82.8)       | 127 (51.2)     |       | 74 (59.7)      | 53 (42.7)      |       |
| Patients with PG-SGA $\geq 7$ n (%)          | 25 (86.2)       | 142 (57.3)     | 0.002 | 80 (64.5)      | 62 (50.0)      | 0.02  |
| QoL mean (SD) EQ-5D index <sup>c</sup>       | 0.678 (0.226)   | 0.709 (0.222)  | 0.49  | 0.700 (0.229)  | 0.717 (0.217)  | 0.31  |
| VAS <sup>d</sup>                             | 55.2 (17.1)     | 59.5 (20.1)    | 0.28  | 55.9 (20.4)    | 62.8 (18.1)    |       |
| Total MET calls mean (SD)                    | 0.24 (1.0)      | 0.13 (0.4)     | 0.38  | 0.10 (0.32)    | 0.15 (0.53)    | 0.95  |
| Total ICU hours mean (SD)                    | 4.3 (19.3)      | 1.9 (13.4)     | 0.53  | 2.3 (15.5)     | 1.5 (11.0)     | 0.62  |

SD, standard deviation; CVS, cardiovascular; GIT, gastrointestinal; LOS, length of hospital stay; IQR, interquartile range; MUST, malnutrition universal screening tool; PG-SGA, patient generated subjective global assessment; QoL, quality of life; EQ-5D, european quality of life 5 dimension; VAS, visual analogue scale; MET, medical emergency team; ICU, intensive care unit  
<sup>a</sup>Higher MUST score indicates high risk for malnutrition, <sup>b</sup>PG-SGA class dichotomized to PG-SGA A (nourished) and PG-SGA B and C (malnourished), <sup>c</sup>Higher EQ-5D index indicates better QoL, <sup>d</sup>Higher VAS indicates better QoL

### Association of malnutrition with very early and late unplanned readmissions and mortality

Table 1 shows the baseline characteristics according to the occurrence of combined endpoint of readmission or death within 0-7 days and 8-180 days of discharge, respectively. Malnutrition risk, as determined by the MUST score, and the classification of patients as being malnourished per PG-SGA class were significantly higher in subjects who developed the combined endpoint both within 0-7 days (83% vs. 51%) and 8-180 (60% vs. 43%) days post-discharge ( $p < 0.05$ ). Similarly, a significantly higher proportion of patients who were in critical need of nutrition therapy (as indicated by PG-SGA score of  $\geq 7$ ) at the time of index admission

suffered the combined endpoint both within 0-7 days ( $p = 0.002$ ) and 8-180 days ( $p = 0.02$ ) following hospital discharge (Table 1).

**Table 2 Unadjusted and adjusted odds ratios (OR) and 95% confidence intervals (95% CI) for early readmission/death (0-7days)**

| Variable                                            | Unadjusted OR (95% CI) | P value | Adjusted OR (95% CI) <sup>a</sup> | P value |
|-----------------------------------------------------|------------------------|---------|-----------------------------------|---------|
| Malnourished                                        | 4.57 (1.69-12.37)      | 0.001   | 5.01 (1.69-14.75)                 | 0.009   |
| Age                                                 | 1.00 (0.96-1.05)       | 0.73    | 1.00 (0.94-1.05)                  | 0.80    |
| Female sex                                          | 0.42 (0.19-0.89)       | 0.03    | 0.42 (0.17-1.04)                  | 0.06    |
| Total comorbidities                                 | 1.08 (0.95-1.23)       | 0.25    | 1.15 (0.96-1.38)                  | 0.13    |
| Charlson comorbidity index                          | 1.16 (0.96-1.40)       | 0.12    | 1.08 (0.84-1.39)                  | 0.55    |
| Medications during index admission                  | 0.97 (0.88-1.05)       | 0.47    | 0.91 (0.81-1.02)                  | 0.12    |
| LOS of index admission                              | 1.03 (1.01-1.04)       | 0.001   | 1.03 (1.00-1.05)                  | 0.02    |
| Admission in last 6 months prior to index admission | 0.77 (0.53-1.12)       | 0.13    | 0.66 (0.27-1.58)                  | 0.35    |
| Principal diagnosis index admission                 |                        |         |                                   |         |
| Reference (Resp. illness)                           | -                      | -       | -                                 | -       |
| CVS                                                 | 0.63 (0.23-1.75)       | 0.38    | 0.63 (0.20-2.04)                  | 0.44    |
| CNS                                                 | 0.61 (0.16-2.32)       | 0.48    | 0.34 (0.06-1.93)                  | 0.23    |
| GIT                                                 | 0.54 (0.13-2.59)       | 0.44    | 0.42 (0.07-2.36)                  | 0.33    |
| Falls                                               | -                      | -       | -                                 | -       |
| Urinary                                             | -                      | -       | -                                 | -       |
| Miscellaneous                                       | 0.61 (0.23-1.61)       | 0.31    | 0.35 (0.11-1.12)                  | 0.07    |
| ICU hours during index admission                    | 1.03 (0.99-1.02)       | 0.56    | 1.01 (0.97-1.05)                  | 0.63    |
| Total MET calls index admission                     | 1.55 (0.95-2.54)       | 0.08    | 0.84 (0.31-2.22)                  | 0.72    |

<sup>a</sup>Odds ratio determined using multivariable logistic regression (using early/late readmissions as outcome variable)  
CI, confidence interval; LOS, length of hospital stay; CVS, cardiovascular; CNS, central nervous system; GIT, gastrointestinal; ICU, intensive care unit; MET, medical emergency team

**Table 3 Unadjusted and adjusted odds ratios (OR) and 95% confidence intervals (95% CI) for late readmission/death (8-180days)**

| Variable                                            | Unadjusted OR (95% CI) | P value | Adjusted OR (95% CI) <sup>a</sup> | P value |
|-----------------------------------------------------|------------------------|---------|-----------------------------------|---------|
| Malnourished                                        | 1.98 (1.19-3.28)       | 0.007   | 1.97 (1.12-3.47)                  | 0.009   |
| Age                                                 | 1.00 (0.98-1.03)       | 0.81    | 1.00 (0.97-1.03)                  | 0.94    |
| Female sex                                          | 0.86 (0.51-1.44)       | 0.56    | 0.93(0.52-1.66)                   | 0.83    |
| Total comorbidities                                 | 1.14 (1.04-1.25)       | 0.006   | 1.07 (0.95-1.22)                  | 0.30    |
| Charlson comorbidity index                          | 1.11 (0.97-1.28)       | 0.13    | 1.03 (0.86-1.23)                  | 0.85    |
| Medications during index admission                  | 1.08 (1.02-1.14)       | 0.008   | 1.05 (0.98-1.12)                  | 0.17    |
| LOS of index admission                              | 1.01 (0.99-1.02)       | 0.45    | 1.01 (0.99-1.02)                  | 0.52    |
| Admission in last 6 months prior to index admission | 1.55 (0.96-2.53)       | 0.07    | 1.38 (0.79-2.40)                  | 0.26    |

|                                     |                  |      |                  |      |
|-------------------------------------|------------------|------|------------------|------|
| Principal diagnosis index admission |                  |      |                  |      |
| Reference (Resp. illness)           | -                | -    | -                | -    |
| CVS                                 | 1.58 (0.75-3.27) | 0.22 | 2.06 (0.91-4.70) | 0.08 |
| CNS                                 | 1.09 (0.44-2.71) | 0.85 | 1.12 (0.41-3.04) | 0.81 |
| GIT                                 | 2.03 (0.71-5.73) | 0.18 | 1.91 (0.58-6.28) | 0.29 |
| Falls                               | 0.26 (0.08-0.85) | 0.03 | 0.26 (0.07-0.89) | 0.03 |
| Urinary                             | 0.83 (0.28-2.41) | 0.72 | 0.71 (0.21-2.32) | 0.57 |
| Miscellaneous                       | 1.40 (0.70-2.79) | 0.34 | 1.36 (0.63-2.92) | 0.44 |
| ICU hours during index admission    | 0.99 (0.98-1.01) | 0.53 | 1.01 (0.98-1.03) | 0.64 |
| Total MET calls index admission     | 0.76 (0.41-1.39) | 0.36 | 0.66 (0.32-1.34) | 0.25 |

<sup>a</sup>Odds ratio determined using multivariable logistic regression (using early/late readmissions as outcome variable)  
 CI, confidence interval; LOS, length of hospital stay; CVS, cardiovascular; CNS, central nervous system; GIT, gastrointestinal; ICU, intensive care unit; MET, medical emergency team

Malnutrition was associated with a higher risk of the combined endpoint of readmissions and death within seven days after discharge (OR 4.57, 95% CI 1.69-12.37,  $p < 0.001$ ; Table 2). After adjusting for covariates, including age, gender, Charlson index, LOS, number of medications, principal diagnosis at current admission and hours spent in the ICU during index admission, the association was even stronger for the combined end-point (OR 5.01, 95% CI 1.69-14.75,  $p = 0.009$ ; Table 2). Similarly, between 8-180 days post-discharge, malnourished patients had higher odds to have a combined end point of readmission and death (OR 1.98, 95% CI 1.19-3.28,  $p = 0.007$ ; Table 3), and this remained significant even after adjustment for the above covariates (OR 1.97, 95% CI 1.12-3.47,  $p = 0.002$ ; Table 3). The p-value for the Hosmer-Lemeshow goodness-of-fit was  $> 0.05$  for both the adjusted models, indicating a good fit. The variance inflation factors and tolerance were near 1.00 for all variables, excluding significant collinearity. The link test confirmed that the linear approach to model the outcomes was correct. The Kaplan Meier survival curve (Figure 1) shows that the nourished group had significantly fewer readmissions and deaths at 180 days than the malnourished group (log rank  $\chi^2=11.4$ ,  $p < 0.001$ ).

## DISCUSSION

The present study's results indicate that malnutrition at admission, as determined by the PG-SGA, was a significant predictor of a combined end-point of readmission or mortality in older general-medical patients, during both the early and late periods after hospital discharge. Malnutrition was associated with an almost four-fold increased risk of readmission or mortality within seven days after discharge, and the risk almost doubled between 8-180 days after discharge. Malnutrition remained a significant predictor even after adjustment for other covariates that could have influenced the clinical outcome.

One appealing explanation for these results is that the acute condition responsible for the index admission weakens the patient's overall health, and malnutrition further compounds this problem with a consequent higher risk of complications or exacerbations of previously stable comorbidities.<sup>21</sup> The post-discharge period is a fragile period, referred to as –'post-hospital syndrome'.<sup>22</sup> This syndrome has been described as a period of vulnerability due to impaired physiological systems, depleted reserves, and lower body resistance against health threats, on top of the recent acute illness responsible for the index admission. The current study's results introduce another dimension to this theory: impaired nutritional status may play a significant role in the post-discharge period beyond seven days. The acute illness and the stress of the index admission may exacerbate malnutrition, possibly inducing a relapse or predisposing the patient to new acute illnesses that increase the risk of readmission or mortality.<sup>23 24</sup>



1  
2  
3 The present study's results are in line with Mogensen et al., who found that  
4  
5 malnourished patients who survived intensive care admission had higher 90-day  
6  
7 mortality (OR 3.72, 95% CI 1.2-6.3) and that malnutrition was a significant predictor  
8  
9 of their 30-day unplanned hospital readmission.<sup>25</sup> Studies in heart-failure patients  
10  
11 have suggested that malnutrition may contribute to the progression of the underlying  
12  
13 heart disease due to low-grade inflammation leading to poor outcomes and was a  
14  
15 significant predictor of readmissions.<sup>26</sup>  
16  
17  
18 Older general-medical patients are known to have substantial long-term morbidity and  
19  
20 mortality. Known risk factors for adverse events following discharge include multiple  
21  
22 comorbidity, severity of index admission and institutional care rather than domiciliary  
23  
24 care.<sup>27</sup> Hospital readmissions represent a multifaceted problem that require a better  
25  
26 understanding.<sup>21</sup> Presumably there are other unknown factors that influence patient  
27  
28 outcomes after discharge. The present study illustrates that early and late post-  
29  
30 discharge patient outcomes appear to be associated with the presence of malnutrition  
31  
32 during admission. While causation cannot be inferred from an observational study, the  
33  
34 malnutrition-post-discharge outcome has biological plausibility.  
35  
36  
37  
38 To date, no study has included nutritional status in the development of a predictive  
39  
40 tool for readmissions and this area needs further research. Studies do suggest that  
41  
42 nutritional intervention initiated early during hospitalisation, by providing high-  
43  
44 energy protein supplements with a continuation post-hospital discharge, does have a  
45  
46 favourable impact on nutritional parameters and reduces the length of hospital stay;  
47  
48 however, its impact on mortality and readmissions is unclear, and such an  
49  
50 intervention may be too late for some.<sup>28 29</sup> While the ideal intervention to improve  
51  
52 nutritional status in hospitalised patients has yet to be identified, the solution may lie  
53  
54  
55  
56  
57  
58  
59  
60

1  
2  
3 in recognising and managing malnutrition in the community before any hospital  
4 admission.<sup>30</sup>  
5  
6  
7  
8

### 9 10 **LIMITATIONS**

11 This study has several limitations. First, it is a single-centre study in a tertiary care  
12 hospital. The case mix of patients discharged from this hospital may differ from that  
13 of other hospitals; thus, the results may not be generalisable particularly to  
14 community hospitals, although it is likely to be similar to other academic hospitals in  
15 Australia. The study was unable to adjust its analysis for functional status or other  
16 factors, such as appropriateness of drugs, clinical stability at discharge or social  
17 factors that might influence readmission. This study involved older general-medical  
18 patients who frequently suffer from multiple comorbidities, and our results may not  
19 be applicable to relatively younger sub-speciality patients with single organ system  
20 involvement.  
21  
22  
23  
24  
25  
26  
27  
28  
29  
30  
31  
32  
33

34 One of the study's strengths is that it was a prospective study and that the malnutrition  
35 diagnosis was confirmed by a dietitian using a comprehensive nutrition assessment  
36 tool. The study also assessed all readmissions in all state hospitals, unlike some other  
37 studies that were only able to capture readmissions to a single hospital.  
38  
39  
40  
41  
42  
43  
44  
45  
46  
47

### 48 **IMPLICATIONS**

49  
50  
51 This study has several implications. Transitions of care should focus not only on the  
52 acute condition but also on the patient's nutritional status, because the latter may  
53 increase the risk of readmission or death. There is a need for future well-designed  
54  
55  
56  
57  
58  
59  
60

1  
2  
3 studies to examine the beneficial effects of an intervention targeting malnutrition and  
4  
5 whether this intervention prevents readmissions and mortality. In the interim,  
6  
7 nutritional intervention should be most effective if begun early during admission and  
8  
9 it should be continued in the community following discharge by referral to either a  
10  
11 community dietitian or follow-up at an outpatient dietetic clinic. Overall, public  
12  
13 health policies to optimise nutrition of those over 60 years of age may result in a  
14  
15 reduction in health-care utilisation.  
16  
17  
18  
19

## 20 21 CONCLUSION

22  
23  
24  
25 Impaired nutritional status at admission predicts poor clinical outcomes in both early  
26  
27 and late post-discharge periods as determined by readmissions and mortality in older  
28  
29 general-medical patients and a targeted nutritional intervention may prove beneficial  
30  
31 in malnourished patients.  
32  
33  
34  
35

36 **Contributors:** YS, CT and MM designed the study and YS, CT, BK and MM carried  
37  
38 out the analysis and interpretation. YS and RS lead the study and were responsible for  
39  
40 data acquisition. YS, PH and CH provided statistical input. YS and RS undertook  
41  
42 recruitment. YS and CT wrote the manuscript, which was edited by BK and MM. All  
43  
44 authors approved final manuscript.  
45  
46  
47  
48

49 **Funding:** This study was not supported by any funding.  
50  
51  
52

53 **Competing interests:** None  
54  
55  
56  
57  
58  
59  
60

**Data sharing statement:** The data that support the findings of this study are available from the corresponding author upon reasonable request.

## References

1. Royal College of Physicians. Hospitals on the Edge? The Time for Action. London: Royal College of Physicians.2012.  
<https://www.rcplondon.ac.uk/guidelines-policy/hospitals-edge-time-action>.
2. Balla U, Malnick S, Schattner A. Early readmissions to the department of medicine as a screening tool for monitoring quality of care problems. *Medicine (Baltimore)* 2008;**87**:294-300.doi:10.1097/MD.0b013e3181886f93
3. Dharmarajan K, Hsieh AF, Lin Z, *et al*. Diagnoses and timing of 30-day readmissions after hospitalization for heart failure, acute myocardial infarction, or pneumonia. *JAMA* 2013;**309**:355-63.doi:10.1001/jama.2012.216476
4. Klausen HH, Petersen J, Bandholm T, *et al*. Association between routine laboratory tests and long-term mortality among acutely admitted older medical patients: a cohort study. *BMC Geriatr* 2017;**17**:62.doi:10.1186/s12877-017-0434-3
5. Puhan MA, Scharplatz M, Troosters T, *et al*. Respiratory rehabilitation after acute exacerbation of COPD may reduce risk for readmission and mortality -- a systematic review. *Respir Res* 2005;**6**:54.doi:10.1186/1465-9921-6-54
6. Bradley EH, Curry L, Horwitz LI, *et al*. Hospital strategies associated with 30-day readmission rates for patients with heart failure. *Circ Cardiovasc Qual Outcomes* 2013;**6**:444-50.doi:10.1161/circoutcomes.111.000101
7. Jencks SF, Williams MV, Coleman EA. Rehospitalizations among patients in the Medicare fee-for-service program. *N Engl J Med* 2009;**360**:1418-28.doi:10.1056/NEJMsa0803563
8. Prescott HC, Sjoding MW, Iwashyna TJ. Diagnoses of early and late readmissions after hospitalization for pneumonia. A systematic review. *Ann Am Thorac Soc* 2014;**11**:1091-100.doi:10.1513/AnnalsATS.201404-1420C

- 1  
2  
3 9. Graham KL, Marcantonio ER. Differences Between Early and Late  
4 Readmissions Among Patients. *Ann Intern Med*  
5 2015;**163**:650.doi:10.7326/l15-5149-2  
6
- 7  
8 10. Kansagara D, Englander H, Salanitro A, *et al*. Risk prediction models for  
9 hospital readmission: a systematic review. *JAMA* 2011;**306**:1688-  
10 98.doi:10.1001/jama.2011.1515  
11
- 12 11. Stratton RJ, Hebuterne X, Elia M. A systematic review and meta-analysis of  
13 the impact of oral nutritional supplements on hospital readmissions.  
14 *Ageing Res Rev* 2013;**12**:884-97.  
15
- 16 12. Sharma Y, Thompson C, Shahi R, *et al*. Malnutrition in acutely unwell  
17 hospitalized elderly - "The skeletons are still rattling in the hospital  
18 closet". *J Nutr* 2017:1-6.doi:doi:10.1007/s12603-017-0903-6  
19
- 20 13. Charlton K, Nichols C, Bowden S, *et al*. Poor nutritional status of older  
21 subacute patients predicts clinical outcomes and mortality at 18 months  
22 of follow-up. *Eur J Clin Nutr* 2012;**66**:1224-8.doi:10.1038/ejcn.2012.130  
23
- 24 14. Kruijenga HM, Wierdsma NJ, van Bokhorst MA, *et al*. Screening of nutritional  
25 status in The Netherlands. *Clin Nutr* 2003;**22**:147-52.  
26
- 27 15. Stratton RJ, King CL, Stroud MA, *et al*. 'Malnutrition Universal Screening Tool'  
28 predicts mortality and length of hospital stay in acutely ill elderly. *Br J*  
29 *Nutr* 2006;**95**:325-30.  
30
- 31 16. Desbrow B, Bauer J, Blum C, *et al*. Assessment of nutritional status in  
32 hemodialysis patients using patient-generated subjective global  
33 assessment. *J Ren Nutr* 2005;**15**:211-6.  
34
- 35 17. Marshall S, Young A, Bauer J, *et al*. Malnutrition in Geriatric Rehabilitation:  
36 Prevalence, Patient Outcomes, and Criterion Validity of the Scored  
37 Patient-Generated Subjective Global Assessment and the Mini Nutritional  
38 Assessment. *J Acad Nutr Diet* 2016;**116**:785-  
39 94.doi:10.1016/j.jand.2015.06.013  
40
- 41 18. Bushnell DMM, Mona.; L.; Ricci, Jean-Francois.; Bracco, Andrea.;. Performance  
42 of the EQ-5D in Patients with Irritable Bowel Syndrome. *Value Health*  
43 2006;**9**:90-97.  
44
- 45 19. Cole A, Shah K, Mulhern B, *et al*. Valuing EQ-5D-5L health states 'in context'  
46 using a discrete choice experiment. *Eur J Health Econ* 2017  
47 doi:10.1007/s10198-017-0905-7  
48
- 49 20. Belsley DA, Kuh E, Welsch RE. *Regression diagnostics: Identifying influential*  
50 *data and sources of collinearity*: John Wiley & Sons, 2005.  
51  
52  
53  
54  
55  
56  
57  
58  
59  
60

- 1  
2  
3 21. Donze J, Lipsitz S, Bates DW, *et al.* Causes and patterns of readmissions in  
4 patients with common comorbidities: retrospective cohort study. *BMJ*  
5 2013;**347**:f7171.doi:10.1136/bmj.f7171  
6  
7  
8 22. Krumholz HM. Post-hospital syndrome--an acquired, transient condition of  
9 generalized risk. *N Engl J Med* 2013;**368**:100-  
10 2.doi:10.1056/NEJMp1212324  
11  
12 23. Alzahrani SH, Alamri SH. Prevalence of malnutrition and associated factors  
13 among hospitalized elderly patients in King Abdulaziz University  
14 Hospital, Jeddah, Saudi Arabia. *BMC Geriatr*  
15 2017;**17**:136.doi:10.1186/s12877-017-0527-z  
16  
17  
18 24. Mazzola P, Ward L, Zazzetta S, *et al.* Association Between Preoperative  
19 Malnutrition and Postoperative Delirium After Hip Fracture Surgery in  
20 Older Adults. *J Am Geriatr Soc* 2017;**65**:1222-28.doi:10.1111/jgs.14764  
21  
22 25. Mogensen KM, Horkan CM, Purtle SW, *et al.* Malnutrition, Critical Illness  
23 Survivors, and Postdischarge Outcomes: A Cohort Study. *JPEN J Parenter*  
24 *Enterl Nutr* 2017:148607117709766.doi:10.1177/0148607117709766  
25  
26  
27 26. Agra Bermejo RM, Gonzalez Ferreiro R, Varela Roman A, *et al.* Nutritional  
28 status is related to heart failure severity and hospital readmissions in  
29 acute heart failure. *Int J Cardiol* 2017;**230**:108-  
30 14.doi:10.1016/j.ijcard.2016.12.067  
31  
32 27. Graham KL, Wilker EH, Howell MD, *et al.* Differences between early and late  
33 readmissions among patients: a cohort study. *Ann Intern Med*  
34 2015;**162**:741-9.doi:10.7326/m14-2159  
35  
36  
37 28. Bally MR, Blaser Yildirim PZ, Bounoure L, *et al.* Nutritional Support and  
38 Outcomes in Malnourished Medical Inpatients: A Systematic Review and  
39 Meta-analysis. *JAMA Intern Med* 2016;**176**:43-  
40 53.doi:10.1001/jamainternmed.2015.6587  
41  
42 29. Sharma Y, Thompson C, Kaambwa B, *et al.* Investigation of the benefits of  
43 early malnutrition screening with telehealth follow up in elderly acute  
44 medical admissions. *QJM* 2017.doi:10.1093/qjmed/hcx095  
45  
46  
47 30. Milne AC, Potter J, Vivanti A, *et al.* Protein and energy supplementation in  
48 elderly people at risk from malnutrition. *Cochrane Database Syst Rev*  
49 2009;**2**.doi:10.1002/14651858.CD003288.pub3  
50  
51

52  
53 **Figure 1 Kaplan-Meier survival curve for combined outcome in nourished and**  
54 **malnourished**  
55  
56  
57  
58  
59  
60

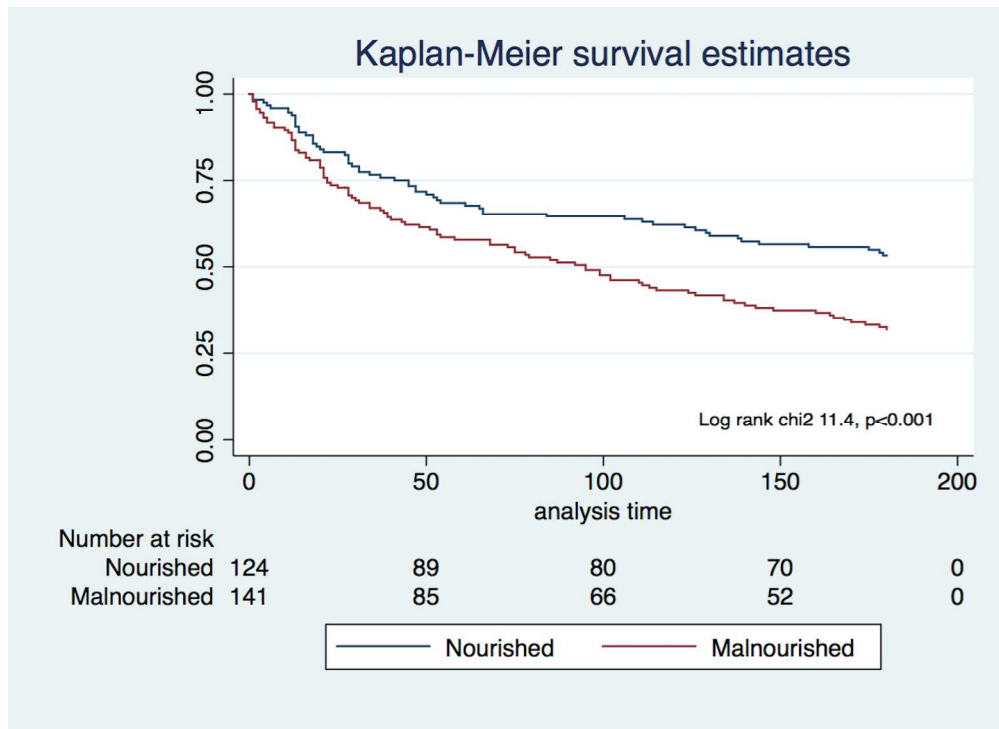

Figure 1 Kaplan-Meier survival curve for combined outcome in nourished and malnourished

222x161mm (300 x 300 DPI)

Review only

STROBE Statement—Checklist of items that should be included in reports of *cross-sectional studies*

|                              | Item No | Recommendation                                                                                                                                                                                                                                                                                                                                                                                                               |
|------------------------------|---------|------------------------------------------------------------------------------------------------------------------------------------------------------------------------------------------------------------------------------------------------------------------------------------------------------------------------------------------------------------------------------------------------------------------------------|
| <b>Title and abstract</b>    | 1       | (a) Indicate the study's design with a commonly used term in the title or the abstract ( <b>Within the title page 1 and methods section of abstract page 3</b> )<br>(b) Provide in the abstract an informative and balanced summary of what was done and what was found ( <b>see results section of abstract page 3 and 4</b> )                                                                                              |
| <b>Introduction</b>          |         |                                                                                                                                                                                                                                                                                                                                                                                                                              |
| Background/rationale         | 2       | Explain the scientific background and rationale for the investigation being reported ( <b>pages 5-6</b> )                                                                                                                                                                                                                                                                                                                    |
| Objectives                   | 3       | State specific objectives, including any prespecified hypotheses ( <b>page 6</b> )                                                                                                                                                                                                                                                                                                                                           |
| <b>Methods</b>               |         |                                                                                                                                                                                                                                                                                                                                                                                                                              |
| Study design                 | 4       | Present key elements of study design early in the paper ( <b>Methods section pages 6-7</b> )                                                                                                                                                                                                                                                                                                                                 |
| Setting                      | 5       | Describe the setting, locations, and relevant dates, including periods of recruitment, exposure, follow-up, and data collection ( <b>pages 6-7</b> )                                                                                                                                                                                                                                                                         |
| Participants                 | 6       | (a) Give the eligibility criteria, and the sources and methods of selection of participants ( <b>pages 6-7</b> )                                                                                                                                                                                                                                                                                                             |
| Variables                    | 7       | Clearly define all outcomes, exposures, predictors, potential confounders, and effect modifiers. Give diagnostic criteria, if applicable ( <b>pages 7-8</b> )                                                                                                                                                                                                                                                                |
| Data sources/<br>measurement | 8*      | For each variable of interest, give sources of data and details of methods of assessment (measurement). Describe comparability of assessment methods if there is more than one group ( <b>pages 8-9</b> )                                                                                                                                                                                                                    |
| Bias                         | 9       | Describe any efforts to address potential sources of bias ( <b>N/A</b> )                                                                                                                                                                                                                                                                                                                                                     |
| Study size                   | 10      | Explain how the study size was arrived at ( <b>page 7</b> )                                                                                                                                                                                                                                                                                                                                                                  |
| Quantitative variables       | 11      | Explain how quantitative variables were handled in the analyses. If applicable, describe which groupings were chosen and why ( <b>pages 8-9</b> )                                                                                                                                                                                                                                                                            |
| Statistical methods          | 12      | (a) Describe all statistical methods, including those used to control for confounding ( <b>pages 9-10</b> )<br>(b) Describe any methods used to examine subgroups and interactions ( <b>N/A</b> )<br>(c) Explain how missing data were addressed ( <b>N/A</b> )<br>(d) If applicable, describe analytical methods taking account of sampling strategy ( <b>N/A</b> )<br>(e) Describe any sensitivity analyses ( <b>N/A</b> ) |
| <b>Results</b>               |         |                                                                                                                                                                                                                                                                                                                                                                                                                              |
| Participants                 | 13*     | (a) Report numbers of individuals at each stage of study—eg numbers potentially eligible, examined for eligibility, confirmed eligible, included in the study, completing follow-up, and analysed                                                                                                                                                                                                                            |



|                          |     |                                                                                                                                                                                                                                              |
|--------------------------|-----|----------------------------------------------------------------------------------------------------------------------------------------------------------------------------------------------------------------------------------------------|
|                          |     | <b>(page 10 and Table 1)</b>                                                                                                                                                                                                                 |
|                          |     | (b) Give reasons for non-participation at each stage (N/A)                                                                                                                                                                                   |
|                          |     | (c) Consider use of a flow diagram (N/A information in Table 1)                                                                                                                                                                              |
| Descriptive data         | 14* | (a) Give characteristics of study participants (eg demographic, clinical, social) and information on exposures and potential confounders (pages 10-11 and Table 1)                                                                           |
|                          |     | (b) Indicate number of participants with missing data for each variable of interest (N/A)                                                                                                                                                    |
| Outcome data             | 15* | Report numbers of outcome events or summary measures (pages 10-11)                                                                                                                                                                           |
| Main results             | 16  | (a) Give unadjusted estimates and, if applicable, confounder-adjusted estimates and their precision (eg, 95% confidence interval). Make clear which confounders were adjusted for and why they were included (pages 12-13 and Table 2 and 3) |
|                          |     | (b) Report category boundaries when continuous variables were categorized (page 12)                                                                                                                                                          |
|                          |     | (c) If relevant, consider translating estimates of relative risk into absolute risk for a meaningful time period (N/A)                                                                                                                       |
| Other analyses           | 17  | Report other analyses done—eg analyses of subgroups and interactions, and sensitivity analyses (N/A)                                                                                                                                         |
| <b>Discussion</b>        |     |                                                                                                                                                                                                                                              |
| Key results              | 18  | Summarise key results with reference to study objectives (page 15)                                                                                                                                                                           |
| Limitations              | 19  | Discuss limitations of the study, taking into account sources of potential bias or imprecision. Discuss both direction and magnitude of any potential bias (page 17)                                                                         |
| Interpretation           | 20  | Give a cautious overall interpretation of results considering objectives, limitations, multiplicity of analyses, results from similar studies, and other relevant evidence (pages 16-17)                                                     |
| Generalisability         | 21  | Discuss the generalisability (external validity) of the study results (pages 17-18)                                                                                                                                                          |
| <b>Other information</b> |     |                                                                                                                                                                                                                                              |
| Funding                  | 22  | Give the source of funding and the role of the funders for the present study and, if applicable, for the original study on which the present article is based (page 19)                                                                      |

\*Give information separately for exposed and unexposed groups.

**Note:** An Explanation and Elaboration article discusses each checklist item and gives methodological background and published examples of transparent reporting. The STROBE checklist is best used in conjunction with this article (freely available on the Web sites of PLoS Medicine at <http://www.plosmedicine.org/>, Annals of Internal Medicine at <http://www.annals.org/>, and Epidemiology at <http://www.epidem.com/>). Information on the STROBE Initiative is available at [www.strobe-statement.org](http://www.strobe-statement.org).
